# Supplementary material for: Identification and validation of aging-related genes in COPD based on bioinformatics analysis
Source: Aging (Albany NY). 2022 May 24;14(10):4336–56. doi: 10.18632/aging.204064 (PMC9186770; doi:10.18632/aging.204064)
Supplement: Supplementary Table 1 [file aging-14-204064-s001.xls]

## Sheet: Table S1
Supplementary Table 1. Gene ontology enrichment analysis.
ID	Descrption	class	Up	Down	num	qvalue
GO:0044421	extracellular region part	Cellular Component	11	3	14	0.00506101
GO:0005576	extracellular region	Cellular Component	12	3	15	0.00506101
GO:0005615	extracellular space	Cellular Component	10	3	13	0.00507767
GO:0005739	mitochondrion	Cellular Component	7	2	9	0.00794751
GO:0031012	extracellular matrix	Cellular Component	2	3	5	0.0237076
GO:0031967	organelle envelope	Cellular Component	5	2	7	0.0237076
GO:0031975	envelope	Cellular Component	5	2	7	0.0237076
GO:0031974	membrane-enclosed lumen	Cellular Component	12	3	15	0.0237076
GO:0043233	organelle lumen	Cellular Component	12	3	15	0.0237076
GO:0070013	intracellular organelle lumen	Cellular Component	12	3	15	0.0237076
GO:0097144	BAX complex	Cellular Component	1	0	1	0.0240056
GO:0099020	perinuclear endoplasmic reticulum lumen	Cellular Component	0	1	1	0.0240056
GO:0070557	PCNA-p21 complex	Cellular Component	1	0	1	0.0397062
GO:0097145	BAK complex	Cellular Component	1	0	1	0.0397062
GO:0005635	nuclear envelope	Cellular Component	3	1	4	0.0397062
GO:0005637	nuclear inner membrane	Cellular Component	2	0	2	0.0397062
GO:0031968	organelle outer membrane	Cellular Component	3	0	3	0.0397062
GO:0019867	outer membrane	Cellular Component	3	0	3	0.0397062
GO:0005896	interleukin-6 receptor complex	Cellular Component	1	0	1	0.045428
GO:0043231	intracellular membrane-bounded organelle	Cellular Component	17	4	21	0.049496
GO:0005102	signaling receptor binding	Molecular Function	8	3	11	0.000501943
GO:0005125	cytokine activity	Molecular Function	5	0	5	0.00110456
GO:0048018	receptor ligand activity	Molecular Function	5	1	6	0.00212454
GO:0030545	receptor regulator activity	Molecular Function	5	1	6	0.00278388
GO:0051400	BH domain binding	Molecular Function	2	0	2	0.00346946
GO:0044877	protein-containing complex binding	Molecular Function	5	3	8	0.00466994
GO:0046983	protein dimerization activity	Molecular Function	7	0	7	0.00899206
GO:0005126	cytokine receptor binding	Molecular Function	4	0	4	0.00983522
GO:0050839	cell adhesion molecule binding	Molecular Function	3	2	5	0.0102299
GO:0005178	integrin binding	Molecular Function	1	2	3	0.0170713
GO:0046982	protein heterodimerization activity	Molecular Function	4	0	4	0.0195567
GO:0008083	growth factor activity	Molecular Function	2	1	3	0.0195567
GO:0019912	cyclin-dependent protein kinase activating kinase activity	Molecular Function	1	0	1	0.0195567
GO:0048156	tau protein binding	Molecular Function	1	1	2	0.0217082
GO:0048020	CCR chemokine receptor binding	Molecular Function	2	0	2	0.0224917
GO:0008009	chemokine activity	Molecular Function	2	0	2	0.0224917
GO:0031732	CCR7 chemokine receptor binding	Molecular Function	1	0	1	0.0298916
GO:0004677	DNA-dependent protein kinase activity	Molecular Function	1	0	1	0.0384
GO:0031735	CCR10 chemokine receptor binding	Molecular Function	1	0	1	0.0384
GO:0042379	chemokine receptor binding	Molecular Function	2	0	2	0.0384
GO:0004340	glucokinase activity	Molecular Function	1	0	1	0.0460226
GO:0004396	hexokinase activity	Molecular Function	1	0	1	0.0460226
GO:0004784	superoxide dismutase activity	Molecular Function	1	0	1	0.0460226
GO:0008865	fructokinase activity	Molecular Function	1	0	1	0.0460226
GO:0016721	oxidoreductase activity, acting on superoxide radicals as acceptor	Molecular Function	1	0	1	0.0460226
GO:0019158	mannokinase activity	Molecular Function	1	0	1	0.0460226
GO:0043120	tumor necrosis factor binding	Molecular Function	1	0	1	0.0460226
GO:0031625	ubiquitin protein ligase binding	Molecular Function	2	1	3	0.0460226
GO:0044389	ubiquitin-like protein ligase binding	Molecular Function	2	1	3	0.0493221
GO:0051434	BH3 domain binding	Molecular Function	1	0	1	0.0493221
GO:0098772	molecular function regulator	Molecular Function	6	1	7	0.0493221
GO:0004222	metalloendopeptidase activity	Molecular Function	1	1	2	0.0493221
GO:0051087	chaperone binding	Molecular Function	1	1	2	0.0493221
GO:0010033	response to organic substance	Biological Process	16	4	20	3.28512e-08
GO:0097193	intrinsic apoptotic signaling pathway	Biological Process	8	1	9	8.75641e-08
GO:0071310	cellular response to organic substance	Biological Process	15	3	18	8.75641e-08
GO:0070887	cellular response to chemical stimulus	Biological Process	16	3	19	1.32471e-07
GO:0033554	cellular response to stress	Biological Process	13	3	16	2.51446e-07
GO:0042981	regulation of apoptotic process	Biological Process	12	2	14	5.07127e-07
GO:0043067	regulation of programmed cell death	Biological Process	12	2	14	5.46424e-07
GO:0019221	cytokine-mediated signaling pathway	Biological Process	11	0	11	7.24537e-07
GO:0097190	apoptotic signaling pathway	Biological Process	9	1	10	7.24537e-07
GO:0042327	positive regulation of phosphorylation	Biological Process	10	2	12	9.82015e-07
GO:0010941	regulation of cell death	Biological Process	12	2	14	9.82015e-07
GO:0008630	intrinsic apoptotic signaling pathway in response to DNA damage	Biological Process	5	1	6	9.82015e-07
GO:0010562	positive regulation of phosphorus metabolic process	Biological Process	10	2	12	1.46657e-06
GO:0045937	positive regulation of phosphate metabolic process	Biological Process	10	2	12	1.46657e-06
GO:0007166	cell surface receptor signaling pathway	Biological Process	15	2	17	2.23862e-06
GO:0042221	response to chemical	Biological Process	16	4	20	2.23862e-06
GO:0009628	response to abiotic stimulus	Biological Process	10	2	12	2.79867e-06
GO:0080135	regulation of cellular response to stress	Biological Process	8	2	10	2.85569e-06
GO:0060548	negative regulation of cell death	Biological Process	9	2	11	2.85569e-06
GO:1902531	regulation of intracellular signal transduction	Biological Process	12	2	14	2.85569e-06
GO:0006915	apoptotic process	Biological Process	12	2	14	3.02597e-06
GO:0001934	positive regulation of protein phosphorylation	Biological Process	9	2	11	3.15398e-06
GO:0042325	regulation of phosphorylation	Biological Process	11	2	13	3.33088e-06
GO:0032270	positive regulation of cellular protein metabolic process	Biological Process	10	3	13	3.33088e-06
GO:0044087	regulation of cellular component biogenesis	Biological Process	8	3	11	3.56851e-06
GO:1903626	positive regulation of DNA catabolic process	Biological Process	3	0	3	4.53923e-06
GO:0051247	positive regulation of protein metabolic process	Biological Process	10	3	13	5.07228e-06
GO:0031325	positive regulation of cellular metabolic process	Biological Process	13	4	17	5.07228e-06
GO:0035556	intracellular signal transduction	Biological Process	14	2	16	5.07228e-06
GO:0012501	programmed cell death	Biological Process	12	2	14	5.34182e-06
GO:0071345	cellular response to cytokine stimulus	Biological Process	11	0	11	5.89153e-06
GO:1902533	positive regulation of intracellular signal transduction	Biological Process	10	1	11	5.92096e-06
GO:0080134	regulation of response to stress	Biological Process	11	2	13	6.55655e-06
GO:0043066	negative regulation of apoptotic process	Biological Process	9	1	10	7.26667e-06
GO:0001932	regulation of protein phosphorylation	Biological Process	10	2	12	7.26667e-06
GO:0043068	positive regulation of programmed cell death	Biological Process	7	2	9	7.33966e-06
GO:0043069	negative regulation of programmed cell death	Biological Process	9	1	10	8.30879e-06
GO:0019220	regulation of phosphate metabolic process	Biological Process	11	2	13	8.30879e-06
GO:0051174	regulation of phosphorus metabolic process	Biological Process	11	2	13	8.30879e-06
GO:0008219	cell death	Biological Process	12	2	14	9.23514e-06
GO:0048585	negative regulation of response to stimulus	Biological Process	11	2	13	9.23514e-06
GO:0051128	regulation of cellular component organization	Biological Process	12	3	15	9.23514e-06
GO:0034097	response to cytokine	Biological Process	11	0	11	9.23514e-06
GO:0070661	leukocyte proliferation	Biological Process	6	1	7	9.42985e-06
GO:0031399	regulation of protein modification process	Biological Process	11	2	13	9.42985e-06
GO:0007165	signal transduction	Biological Process	17	4	21	9.42985e-06
GO:0010942	positive regulation of cell death	Biological Process	7	2	9	1.12605e-05
GO:0009966	regulation of signal transduction	Biological Process	13	3	16	1.12605e-05
GO:0009893	positive regulation of metabolic process	Biological Process	13	4	17	1.12605e-05
GO:0031401	positive regulation of protein modification process	Biological Process	9	2	11	1.12605e-05
GO:0006950	response to stress	Biological Process	14	4	18	1.16967e-05
GO:0071214	cellular response to abiotic stimulus	Biological Process	7	0	7	1.16967e-05
GO:0104004	cellular response to environmental stimulus	Biological Process	7	0	7	1.16967e-05
GO:0051173	positive regulation of nitrogen compound metabolic process	Biological Process	12	4	16	1.16967e-05
GO:0008283	cell proliferation	Biological Process	10	3	13	1.16967e-05
GO:0032963	collagen metabolic process	Biological Process	3	2	5	1.1832e-05
GO:0048523	negative regulation of cellular process	Biological Process	16	3	19	1.1832e-05
GO:0030335	positive regulation of cell migration	Biological Process	7	1	8	1.26563e-05
GO:0009968	negative regulation of signal transduction	Biological Process	9	2	11	1.4789e-05
GO:0048583	regulation of response to stimulus	Biological Process	15	3	18	1.67811e-05
GO:2000147	positive regulation of cell motility	Biological Process	7	1	8	1.69117e-05
GO:0042127	regulation of cell proliferation	Biological Process	10	2	12	1.70332e-05
GO:0009967	positive regulation of signal transduction	Biological Process	11	1	12	1.88627e-05
GO:0010604	positive regulation of macromolecule metabolic process	Biological Process	12	4	16	1.9969e-05
GO:0016310	phosphorylation	Biological Process	12	2	14	1.9969e-05
GO:0051272	positive regulation of cellular component movement	Biological Process	7	1	8	1.9969e-05
GO:2001234	negative regulation of apoptotic signaling pathway	Biological Process	5	1	6	2.05024e-05
GO:0048584	positive regulation of response to stimulus	Biological Process	12	2	14	2.26809e-05
GO:0040017	positive regulation of locomotion	Biological Process	7	1	8	2.26809e-05
GO:1903624	regulation of DNA catabolic process	Biological Process	3	0	3	2.39604e-05
GO:0072359	circulatory system development	Biological Process	8	2	10	2.43679e-05
GO:0070482	response to oxygen levels	Biological Process	5	2	7	2.50746e-05
GO:0023052	signaling	Biological Process	17	4	21	2.5415e-05
GO:0051094	positive regulation of developmental process	Biological Process	9	2	11	2.5415e-05
GO:0010648	negative regulation of cell communication	Biological Process	9	2	11	2.56192e-05
GO:0023057	negative regulation of signaling	Biological Process	9	2	11	2.58282e-05
GO:0007154	cell communication	Biological Process	17	4	21	2.60097e-05
GO:0031331	positive regulation of cellular catabolic process	Biological Process	6	1	7	2.88771e-05
GO:0010332	response to gamma radiation	Biological Process	4	0	4	2.88771e-05
GO:0051716	cellular response to stimulus	Biological Process	18	4	22	3.01606e-05
GO:0010646	regulation of cell communication	Biological Process	13	3	16	3.31351e-05
GO:0023051	regulation of signaling	Biological Process	13	3	16	3.90783e-05
GO:0010647	positive regulation of cell communication	Biological Process	11	1	12	4.21997e-05
GO:0032268	regulation of cellular protein metabolic process	Biological Process	11	3	14	4.21997e-05
GO:0023056	positive regulation of signaling	Biological Process	11	1	12	4.28011e-05
GO:0043065	positive regulation of apoptotic process	Biological Process	6	2	8	4.29709e-05
GO:0072593	reactive oxygen species metabolic process	Biological Process	4	2	6	4.95422e-05
GO:0016477	cell migration	Biological Process	9	2	11	5.36316e-05
GO:0150076	neuroinflammatory response	Biological Process	3	1	4	5.36316e-05
GO:0009314	response to radiation	Biological Process	7	0	7	5.60716e-05
GO:0046651	lymphocyte proliferation	Biological Process	6	0	6	5.75077e-05
GO:0048522	positive regulation of cellular process	Biological Process	15	4	19	5.75077e-05
GO:0032943	mononuclear cell proliferation	Biological Process	6	0	6	5.99957e-05
GO:2001242	regulation of intrinsic apoptotic signaling pathway	Biological Process	4	1	5	5.99957e-05
GO:0098586	cellular response to virus	Biological Process	4	0	4	6.01048e-05
GO:0033993	response to lipid	Biological Process	7	2	9	6.16682e-05
GO:0009896	positive regulation of catabolic process	Biological Process	6	1	7	6.42995e-05
GO:0048518	positive regulation of biological process	Biological Process	16	4	20	6.73046e-05
GO:0048519	negative regulation of biological process	Biological Process	16	3	19	7.37174e-05
GO:0006468	protein phosphorylation	Biological Process	10	2	12	8.68074e-05
GO:0007568	aging	Biological Process	5	1	6	9.38476e-05
GO:0051246	regulation of protein metabolic process	Biological Process	11	3	14	9.42256e-05
GO:0071347	cellular response to interleukin-1	Biological Process	5	0	5	0.000103025
GO:1901700	response to oxygen-containing compound	Biological Process	9	2	11	0.000103752
GO:0050896	response to stimulus	Biological Process	19	4	23	0.000105639
GO:0051130	positive regulation of cellular component organization	Biological Process	8	2	10	0.00010639
GO:0009725	response to hormone	Biological Process	7	2	9	0.000107027
GO:0051707	response to other organism	Biological Process	8	1	9	0.00012669
GO:0043207	response to external biotic stimulus	Biological Process	8	1	9	0.00012669
GO:0043410	positive regulation of MAPK cascade	Biological Process	6	1	7	0.00012669
GO:2000377	regulation of reactive oxygen species metabolic process	Biological Process	4	1	5	0.00012669
GO:0048870	cell motility	Biological Process	9	2	11	0.00012669
GO:0051674	localization of cell	Biological Process	9	2	11	0.00012669
GO:0071478	cellular response to radiation	Biological Process	5	0	5	0.000137043
GO:0010575	positive regulation of vascular endothelial growth factor production	Biological Process	3	0	3	0.000147317
GO:0002521	leukocyte differentiation	Biological Process	6	1	7	0.000151053
GO:0044093	positive regulation of molecular function	Biological Process	9	2	11	0.000153091
GO:0043085	positive regulation of catalytic activity	Biological Process	8	2	10	0.000158157
GO:0009607	response to biotic stimulus	Biological Process	8	1	9	0.000158993
GO:0070555	response to interleukin-1	Biological Process	5	0	5	0.000169615
GO:0036293	response to decreased oxygen levels	Biological Process	4	2	6	0.000171253
GO:0002682	regulation of immune system process	Biological Process	9	2	11	0.000181412
GO:2001243	negative regulation of intrinsic apoptotic signaling pathway	Biological Process	3	1	4	0.000181412
GO:0030947	regulation of vascular endothelial growth factor receptor signaling pathway	Biological Process	3	0	3	0.000187623
GO:0071480	cellular response to gamma radiation	Biological Process	3	0	3	0.000187623
GO:0010574	regulation of vascular endothelial growth factor production	Biological Process	3	0	3	0.000204839
GO:0030098	lymphocyte differentiation	Biological Process	5	1	6	0.000204839
GO:0060574	intestinal epithelial cell maturation	Biological Process	2	0	2	0.000223286
GO:0001775	cell activation	Biological Process	7	3	10	0.000229535
GO:0009605	response to external stimulus	Biological Process	11	2	13	0.00023106
GO:2000379	positive regulation of reactive oxygen species metabolic process	Biological Process	3	1	4	0.000233306
GO:0050670	regulation of lymphocyte proliferation	Biological Process	5	0	5	0.000235642
GO:0150077	regulation of neuroinflammatory response	Biological Process	3	0	3	0.000236339
GO:2001233	regulation of apoptotic signaling pathway	Biological Process	5	1	6	0.000240398
GO:0032944	regulation of mononuclear cell proliferation	Biological Process	5	0	5	0.000240398
GO:0071887	leukocyte apoptotic process	Biological Process	4	0	4	0.000251261
GO:0010573	vascular endothelial growth factor production	Biological Process	3	0	3	0.000274442
GO:0030334	regulation of cell migration	Biological Process	7	1	8	0.000274442
GO:0032879	regulation of localization	Biological Process	11	2	13	0.000285463
GO:0050867	positive regulation of cell activation	Biological Process	4	2	6	0.000309239
GO:0050865	regulation of cell activation	Biological Process	5	2	7	0.000309624
GO:0002376	immune system process	Biological Process	12	2	14	0.000319435
GO:0070663	regulation of leukocyte proliferation	Biological Process	5	0	5	0.00032072
GO:1902512	positive regulation of apoptotic DNA fragmentation	Biological Process	2	0	2	0.000328734
GO:0002684	positive regulation of immune system process	Biological Process	7	2	9	0.000328734
GO:0040011	locomotion	Biological Process	9	2	11	0.000333353
GO:0051704	multi-organism process	Biological Process	11	2	13	0.000353718
GO:0030097	hemopoiesis	Biological Process	7	1	8	0.000372022
GO:0021987	cerebral cortex development	Biological Process	4	0	4	0.000383285
GO:0006954	inflammatory response	Biological Process	7	1	8	0.000390385
GO:0006308	DNA catabolic process	Biological Process	3	0	3	0.000403839
GO:2000145	regulation of cell motility	Biological Process	7	1	8	0.000412609
GO:0048869	cellular developmental process	Biological Process	13	3	16	0.000419418
GO:0006796	phosphate-containing compound metabolic process	Biological Process	12	2	14	0.000451177
GO:1902339	positive regulation of apoptotic process involved in morphogenesis	Biological Process	2	0	2	0.000457265
GO:1904747	positive regulation of apoptotic process involved in development	Biological Process	2	0	2	0.000457265
GO:0048534	hematopoietic or lymphoid organ development	Biological Process	7	1	8	0.000467524
GO:0006793	phosphorus metabolic process	Biological Process	12	2	14	0.000482823
GO:0001774	microglial cell activation	Biological Process	2	1	3	0.000507852
GO:0008285	negative regulation of cell proliferation	Biological Process	7	0	7	0.000507852
GO:0046330	positive regulation of JNK cascade	Biological Process	3	1	4	0.000511455
GO:0009888	tissue development	Biological Process	9	2	11	0.000518334
GO:0001944	vasculature development	Biological Process	5	2	7	0.000537296
GO:0072358	cardiovascular system development	Biological Process	5	2	7	0.000537296
GO:0045321	leukocyte activation	Biological Process	7	2	9	0.0005407
GO:0050671	positive regulation of lymphocyte proliferation	Biological Process	4	0	4	0.0005407
GO:0032946	positive regulation of mononuclear cell proliferation	Biological Process	4	0	4	0.000552887
GO:0045597	positive regulation of cell differentiation	Biological Process	6	2	8	0.000555251
GO:0043408	regulation of MAPK cascade	Biological Process	6	1	7	0.00056979
GO:0002269	leukocyte activation involved in inflammatory response	Biological Process	2	1	3	0.000578397
GO:0002069	columnar/cuboidal epithelial cell maturation	Biological Process	2	0	2	0.000583533
GO:0070372	regulation of ERK1 and ERK2 cascade	Biological Process	4	1	5	0.000596425
GO:0002687	positive regulation of leukocyte migration	Biological Process	3	1	4	0.000596425
GO:0040012	regulation of locomotion	Biological Process	7	1	8	0.000612997
GO:0002520	immune system development	Biological Process	7	1	8	0.000613762
GO:0030183	B cell differentiation	Biological Process	3	1	4	0.000635858
GO:0090068	positive regulation of cell cycle process	Biological Process	4	1	5	0.000639392
GO:0050729	positive regulation of inflammatory response	Biological Process	4	0	4	0.000645716
GO:0032101	regulation of response to external stimulus	Biological Process	7	1	8	0.000646635
GO:0051270	regulation of cellular component movement	Biological Process	7	1	8	0.000646635
GO:0010212	response to ionizing radiation	Biological Process	4	0	4	0.000646635
GO:0014009	glial cell proliferation	Biological Process	2	1	3	0.000646635
GO:0007417	central nervous system development	Biological Process	7	1	8	0.000646635
GO:0070665	positive regulation of leukocyte proliferation	Biological Process	4	0	4	0.000675962
GO:0061900	glial cell activation	Biological Process	2	1	3	0.000676718
GO:0042063	gliogenesis	Biological Process	3	2	5	0.000699661
GO:0000077	DNA damage checkpoint	Biological Process	4	0	4	0.000699661
GO:0032364	oxygen homeostasis	Biological Process	2	0	2	0.000699661
GO:0033129	positive regulation of histone phosphorylation	Biological Process	2	0	2	0.000699661
GO:1903896	positive regulation of IRE1-mediated unfolded protein response	Biological Process	2	0	2	0.000699661
GO:0022607	cellular component assembly	Biological Process	10	3	13	0.000710218
GO:1903428	positive regulation of reactive oxygen species biosynthetic process	Biological Process	2	1	3	0.000728631
GO:0051249	regulation of lymphocyte activation	Biological Process	5	1	6	0.000728631
GO:0000187	activation of MAPK activity	Biological Process	4	0	4	0.000728631
GO:0046649	lymphocyte activation	Biological Process	6	1	7	0.000730011
GO:0070371	ERK1 and ERK2 cascade	Biological Process	4	1	5	0.000730011
GO:0051171	regulation of nitrogen compound metabolic process	Biological Process	14	4	18	0.000731171
GO:0006928	movement of cell or subcellular component	Biological Process	9	2	11	0.000744047
GO:0001541	ovarian follicle development	Biological Process	2	1	3	0.000744833
GO:1901214	regulation of neuron death	Biological Process	4	1	5	0.000760036
GO:0048513	animal organ development	Biological Process	12	2	14	0.000779398
GO:0031570	DNA integrity checkpoint	Biological Process	4	0	4	0.000791922
GO:0045860	positive regulation of protein kinase activity	Biological Process	5	1	6	0.000795637
GO:0050793	regulation of developmental process	Biological Process	10	2	12	0.000796158
GO:1902532	negative regulation of intracellular signal transduction	Biological Process	5	1	6	0.000796158
GO:0006977	DNA damage response, signal transduction by p53 class mediator resulting in cell cycle arrest	Biological Process	3	0	3	0.000801064
GO:0051240	positive regulation of multicellular organismal process	Biological Process	7	3	10	0.000807167
GO:0043254	regulation of protein complex assembly	Biological Process	5	1	6	0.000826533
GO:0072431	signal transduction involved in mitotic G1 DNA damage checkpoint	Biological Process	3	0	3	0.000827933
GO:1902400	intracellular signal transduction involved in G1 DNA damage checkpoint	Biological Process	3	0	3	0.000827933
GO:0032874	positive regulation of stress-activated MAPK cascade	Biological Process	3	1	4	0.000834603
GO:0001836	release of cytochrome c from mitochondria	Biological Process	2	1	3	0.000854624
GO:1902402	signal transduction involved in mitotic DNA damage checkpoint	Biological Process	3	0	3	0.000854624
GO:1902403	signal transduction involved in mitotic DNA integrity checkpoint	Biological Process	3	0	3	0.000854624
GO:0032103	positive regulation of response to external stimulus	Biological Process	5	0	5	0.000854624
GO:0070304	positive regulation of stress-activated protein kinase signaling cascade	Biological Process	3	1	4	0.000854624
GO:0001959	regulation of cytokine-mediated signaling pathway	Biological Process	4	0	4	0.000870774
GO:0031960	response to corticosteroid	Biological Process	3	1	4	0.000887119
GO:0042113	B cell activation	Biological Process	4	1	5	0.000915325
GO:0072413	signal transduction involved in mitotic cell cycle checkpoint	Biological Process	3	0	3	0.000919343
GO:0030154	cell differentiation	Biological Process	12	3	15	0.000954087
GO:0006351	transcription, DNA-templated	Biological Process	11	3	14	0.000954087
GO:0097659	nucleic acid-templated transcription	Biological Process	11	3	14	0.000955696
GO:0048771	tissue remodeling	Biological Process	3	1	4	0.000967453
GO:0009889	regulation of biosynthetic process	Biological Process	12	3	15	0.000971274
GO:0080090	regulation of primary metabolic process	Biological Process	14	4	18	0.000984101
GO:0034654	nucleobase-containing compound biosynthetic process	Biological Process	12	3	15	0.000993512
GO:0032774	RNA biosynthetic process	Biological Process	11	3	14	0.000997158
GO:0044089	positive regulation of cellular component biogenesis	Biological Process	4	2	6	0.00104299
GO:0048731	system development	Biological Process	13	3	16	0.00104299
GO:0021543	pallium development	Biological Process	4	0	4	0.00104316
GO:0060759	regulation of response to cytokine stimulus	Biological Process	4	0	4	0.00104316
GO:1901701	cellular response to oxygen-containing compound	Biological Process	7	1	8	0.00105555
GO:0045595	regulation of cell differentiation	Biological Process	8	2	10	0.00107221
GO:0031571	mitotic G1 DNA damage checkpoint	Biological Process	3	0	3	0.00108532
GO:0009615	response to virus	Biological Process	4	1	5	0.00108532
GO:0001666	response to hypoxia	Biological Process	4	1	5	0.00108532
GO:0033483	gas homeostasis	Biological Process	2	0	2	0.00108532
GO:0046886	positive regulation of hormone biosynthetic process	Biological Process	2	0	2	0.00108532
GO:1902510	regulation of apoptotic DNA fragmentation	Biological Process	2	0	2	0.00108532
GO:0046328	regulation of JNK cascade	Biological Process	3	1	4	0.001093
GO:0070997	neuron death	Biological Process	4	1	5	0.001093
GO:0002548	monocyte chemotaxis	Biological Process	3	0	3	0.001093
GO:0044783	G1 DNA damage checkpoint	Biological Process	3	0	3	0.001093
GO:0044819	mitotic G1/S transition checkpoint	Biological Process	3	0	3	0.001093
GO:0018130	heterocycle biosynthetic process	Biological Process	12	3	15	0.00112696
GO:0019438	aromatic compound biosynthetic process	Biological Process	12	3	15	0.00115419
GO:0031323	regulation of cellular metabolic process	Biological Process	14	4	18	0.00116607
GO:0050727	regulation of inflammatory response	Biological Process	5	1	6	0.00116607
GO:0032722	positive regulation of chemokine production	Biological Process	3	0	3	0.00116607
GO:0051251	positive regulation of lymphocyte activation	Biological Process	4	1	5	0.00116607
GO:0060255	regulation of macromolecule metabolic process	Biological Process	14	4	18	0.00118944
GO:0006952	defense response	Biological Process	9	1	10	0.00118944
GO:1902337	regulation of apoptotic process involved in morphogenesis	Biological Process	2	0	2	0.00122476
GO:1904748	regulation of apoptotic process involved in development	Biological Process	2	0	2	0.00122476
GO:0071479	cellular response to ionizing radiation	Biological Process	3	0	3	0.00124359
GO:0002694	regulation of leukocyte activation	Biological Process	5	1	6	0.00125735
GO:0033674	positive regulation of kinase activity	Biological Process	5	1	6	0.00127057
GO:0048514	blood vessel morphogenesis	Biological Process	4	2	6	0.00127057
GO:0038034	signal transduction in absence of ligand	Biological Process	3	0	3	0.00127168
GO:0097192	extrinsic apoptotic signaling pathway in absence of ligand	Biological Process	3	0	3	0.00127168
GO:0044085	cellular component biogenesis	Biological Process	10	3	13	0.00130286
GO:0072401	signal transduction involved in DNA integrity checkpoint	Biological Process	3	0	3	0.00130994
GO:0072422	signal transduction involved in DNA damage checkpoint	Biological Process	3	0	3	0.00130994
GO:0050864	regulation of B cell activation	Biological Process	3	1	4	0.00132506
GO:0045862	positive regulation of proteolysis	Biological Process	2	3	5	0.00133063
GO:0006974	cellular response to DNA damage stimulus	Biological Process	6	1	7	0.00133485
GO:0030949	positive regulation of vascular endothelial growth factor receptor signaling pathway	Biological Process	2	0	2	0.0013659
GO:0033127	regulation of histone phosphorylation	Biological Process	2	0	2	0.0013659
GO:0060576	intestinal epithelial cell development	Biological Process	2	0	2	0.0013659
GO:0072395	signal transduction involved in cell cycle checkpoint	Biological Process	3	0	3	0.00143855
GO:0042098	T cell proliferation	Biological Process	4	0	4	0.0014499
GO:0009891	positive regulation of biosynthetic process	Biological Process	7	3	10	0.00147556
GO:1903708	positive regulation of hemopoiesis	Biological Process	3	1	4	0.00149491
GO:0045787	positive regulation of cell cycle	Biological Process	4	1	5	0.00152032
GO:0014823	response to activity	Biological Process	3	0	3	0.00152032
GO:0060260	regulation of transcription initiation from RNA polymerase II promoter	Biological Process	3	0	3	0.00152032
GO:0035966	response to topologically incorrect protein	Biological Process	2	2	4	0.00152448
GO:1901362	organic cyclic compound biosynthetic process	Biological Process	12	3	15	0.00152448
GO:0070278	extracellular matrix constituent secretion	Biological Process	1	1	2	0.00152448
GO:0150078	positive regulation of neuroinflammatory response	Biological Process	2	0	2	0.00152448
GO:1900103	positive regulation of endoplasmic reticulum unfolded protein response	Biological Process	2	0	2	0.00152448
GO:0002685	regulation of leukocyte migration	Biological Process	3	1	4	0.00155951
GO:0000075	cell cycle checkpoint	Biological Process	4	0	4	0.00163557
GO:0043523	regulation of neuron apoptotic process	Biological Process	4	0	4	0.00163557
GO:0008284	positive regulation of cell proliferation	Biological Process	6	1	7	0.00163557
GO:0022617	extracellular matrix disassembly	Biological Process	2	1	3	0.00163557
GO:0048145	regulation of fibroblast proliferation	Biological Process	3	0	3	0.00163557
GO:2000112	regulation of cellular macromolecule biosynthetic process	Biological Process	12	2	14	0.00164713
GO:0031329	regulation of cellular catabolic process	Biological Process	6	1	7	0.00167294
GO:0048144	fibroblast proliferation	Biological Process	3	0	3	0.00167294
GO:2000106	regulation of leukocyte apoptotic process	Biological Process	3	0	3	0.00167294
GO:0007254	JNK cascade	Biological Process	3	1	4	0.00168
GO:0002070	epithelial cell maturation	Biological Process	2	0	2	0.00168011
GO:1903894	regulation of IRE1-mediated unfolded protein response	Biological Process	2	0	2	0.00168011
GO:0002696	positive regulation of leukocyte activation	Biological Process	4	1	5	0.00168905
GO:0000165	MAPK cascade	Biological Process	6	1	7	0.00171173
GO:0023014	signal transduction by protein phosphorylation	Biological Process	6	1	7	0.00171173
GO:0014070	response to organic cyclic compound	Biological Process	4	3	7	0.0017172
GO:0097529	myeloid leukocyte migration	Biological Process	3	1	4	0.00173074
GO:0010556	regulation of macromolecule biosynthetic process	Biological Process	12	2	14	0.00173154
GO:0050794	regulation of cellular process	Biological Process	19	4	23	0.00173154
GO:0071158	positive regulation of cell cycle arrest	Biological Process	3	0	3	0.00173154
GO:2000142	regulation of DNA-templated transcription, initiation	Biological Process	3	0	3	0.0017874
GO:0030198	extracellular matrix organization	Biological Process	3	2	5	0.00181485
GO:0032352	positive regulation of hormone metabolic process	Biological Process	2	0	2	0.00184355
GO:0090399	replicative senescence	Biological Process	2	0	2	0.00184355
GO:0002064	epithelial cell development	Biological Process	4	0	4	0.00187135
GO:0070098	chemokine-mediated signaling pathway	Biological Process	3	0	3	0.00188376
GO:0097191	extrinsic apoptotic signaling pathway	Biological Process	4	0	4	0.00189137
GO:0009719	response to endogenous stimulus	Biological Process	7	2	9	0.00192695
GO:0006367	transcription initiation from RNA polymerase II promoter	Biological Process	3	1	4	0.00194421
GO:2000026	regulation of multicellular organismal development	Biological Process	8	2	10	0.0019894
GO:0006355	regulation of transcription, DNA-templated	Biological Process	11	2	13	0.00199751
GO:1903506	regulation of nucleic acid-templated transcription	Biological Process	11	2	13	0.00199924
GO:0000302	response to reactive oxygen species	Biological Process	4	0	4	0.00199924
GO:1900119	positive regulation of execution phase of apoptosis	Biological Process	2	0	2	0.00199924
GO:1901550	regulation of endothelial cell development	Biological Process	2	0	2	0.00199924
GO:1903140	regulation of establishment of endothelial barrier	Biological Process	2	0	2	0.00199924
GO:0001776	leukocyte homeostasis	Biological Process	3	0	3	0.00199924
GO:0034644	cellular response to UV	Biological Process	3	0	3	0.00199924
GO:0065007	biological regulation	Biological Process	20	4	24	0.00199924
GO:0051347	positive regulation of transferase activity	Biological Process	5	1	6	0.00199924
GO:0032872	regulation of stress-activated MAPK cascade	Biological Process	3	1	4	0.00199924
GO:2001141	regulation of RNA biosynthetic process	Biological Process	11	2	13	0.00199924
GO:0001568	blood vessel development	Biological Process	4	2	6	0.00202076
GO:0051149	positive regulation of muscle cell differentiation	Biological Process	2	1	3	0.00202812
GO:0048856	anatomical structure development	Biological Process	14	3	17	0.00202812
GO:0010468	regulation of gene expression	Biological Process	11	4	15	0.00202812
GO:0070302	regulation of stress-activated protein kinase signaling cascade	Biological Process	3	1	4	0.00206527
GO:0016043	cellular component organization	Biological Process	15	3	18	0.00211187
GO:0032642	regulation of chemokine production	Biological Process	3	0	3	0.00213506
GO:0071363	cellular response to growth factor stimulus	Biological Process	5	1	6	0.00213774
GO:0035743	CD4-positive, alpha-beta T cell cytokine production	Biological Process	2	0	2	0.00213774
GO:0060252	positive regulation of glial cell proliferation	Biological Process	2	0	2	0.00213774
GO:0070242	thymocyte apoptotic process	Biological Process	2	0	2	0.00213774
GO:1903978	regulation of microglial cell activation	Biological Process	2	0	2	0.00213774
GO:0032602	chemokine production	Biological Process	3	0	3	0.002158
GO:0048010	vascular endothelial growth factor receptor signaling pathway	Biological Process	3	0	3	0.002158
GO:0071674	mononuclear cell migration	Biological Process	3	0	3	0.00221984
GO:0031347	regulation of defense response	Biological Process	6	1	7	0.00223961
GO:1901216	positive regulation of neuron death	Biological Process	2	1	3	0.0022628
GO:1903426	regulation of reactive oxygen species biosynthetic process	Biological Process	2	1	3	0.0022628
GO:1905897	regulation of response to endoplasmic reticulum stress	Biological Process	2	1	3	0.0022628
GO:0051402	neuron apoptotic process	Biological Process	4	0	4	0.00230613
GO:0008585	female gonad development	Biological Process	2	1	3	0.00230613
GO:1990868	response to chemokine	Biological Process	3	0	3	0.00230613
GO:1990869	cellular response to chemokine	Biological Process	3	0	3	0.00230613
GO:0032760	positive regulation of tumor necrosis factor production	Biological Process	2	1	3	0.00237003
GO:0048468	cell development	Biological Process	9	1	10	0.00237655
GO:0051054	positive regulation of DNA metabolic process	Biological Process	4	0	4	0.00238137
GO:0060249	anatomical structure homeostasis	Biological Process	4	1	5	0.00238137
GO:0006979	response to oxidative stress	Biological Process	4	1	5	0.00239878
GO:0042116	macrophage activation	Biological Process	2	1	3	0.00240744
GO:0043122	regulation of I-kappaB kinase/NF-kappaB signaling	Biological Process	4	0	4	0.00243466
GO:0042100	B cell proliferation	Biological Process	3	0	3	0.00246576
GO:0070848	response to growth factor	Biological Process	5	1	6	0.00248663
GO:0046827	positive regulation of protein export from nucleus	Biological Process	2	0	2	0.00248791
GO:1902176	negative regulation of oxidative stress-induced intrinsic apoptotic signaling pathway	Biological Process	2	0	2	0.00248791
GO:0051049	regulation of transport	Biological Process	8	1	9	0.00249982
GO:0042102	positive regulation of T cell proliferation	Biological Process	3	0	3	0.00250383
GO:0031326	regulation of cellular biosynthetic process	Biological Process	12	2	14	0.00251984
GO:0046545	development of primary female sexual characteristics	Biological Process	2	1	3	0.00255617
GO:1903557	positive regulation of tumor necrosis factor superfamily cytokine production	Biological Process	2	1	3	0.00255617
GO:0035295	tube development	Biological Process	5	2	7	0.00259245
GO:0051052	regulation of DNA metabolic process	Biological Process	5	0	5	0.00260757
GO:0002824	positive regulation of adaptive immune response based on somatic recombination of immune receptors built from immunoglobulin superfamily domains	Biological Process	3	0	3	0.00260902
GO:1900017	positive regulation of cytokine production involved in inflammatory response	Biological Process	2	0	2	0.00266996
GO:0007275	multicellular organism development	Biological Process	13	3	16	0.00266996
GO:0043406	positive regulation of MAP kinase activity	Biological Process	4	0	4	0.00266996
GO:0009653	anatomical structure morphogenesis	Biological Process	8	3	11	0.00266996
GO:0044773	mitotic DNA damage checkpoint	Biological Process	3	0	3	0.00271957
GO:0009894	regulation of catabolic process	Biological Process	6	1	7	0.00271957
GO:0043062	extracellular structure organization	Biological Process	3	2	5	0.002732
GO:0021537	telencephalon development	Biological Process	4	0	4	0.00283859
GO:0007569	cell aging	Biological Process	3	0	3	0.00284042
GO:2000134	negative regulation of G1/S transition of mitotic cell cycle	Biological Process	3	0	3	0.00284042
GO:0002827	positive regulation of T-helper 1 type immune response	Biological Process	2	0	2	0.00286043
GO:0060575	intestinal epithelial cell differentiation	Biological Process	2	0	2	0.00286043
GO:0019222	regulation of metabolic process	Biological Process	14	4	18	0.00288077
GO:0002821	positive regulation of adaptive immune response	Biological Process	3	0	3	0.00288077
GO:0045621	positive regulation of lymphocyte differentiation	Biological Process	2	1	3	0.00288077
GO:0071840	cellular component organization or biogenesis	Biological Process	15	3	18	0.00289769
GO:0065003	protein-containing complex assembly	Biological Process	8	1	9	0.00289769
GO:0044774	mitotic DNA integrity checkpoint	Biological Process	3	0	3	0.00293662
GO:0051239	regulation of multicellular organismal process	Biological Process	9	3	12	0.00299295
GO:0030330	DNA damage response, signal transduction by p53 class mediator	Biological Process	3	0	3	0.00299295
GO:1902807	negative regulation of cell cycle G1/S phase transition	Biological Process	3	0	3	0.00299295
GO:0007095	mitotic G2 DNA damage checkpoint	Biological Process	2	0	2	0.00304198
GO:0035988	chondrocyte proliferation	Biological Process	0	2	2	0.00304198
GO:0071156	regulation of cell cycle arrest	Biological Process	3	0	3	0.00304978
GO:0022603	regulation of anatomical structure morphogenesis	Biological Process	7	0	7	0.00310146
GO:0034645	cellular macromolecule biosynthetic process	Biological Process	12	3	15	0.00325731
GO:0048646	anatomical structure formation involved in morphogenesis	Biological Process	5	2	7	0.00325731
GO:0002726	positive regulation of T cell cytokine production	Biological Process	2	0	2	0.00325731
GO:1901889	negative regulation of cell junction assembly	Biological Process	1	1	2	0.00325731
GO:1904706	negative regulation of vascular smooth muscle cell proliferation	Biological Process	2	0	2	0.00325731
GO:0046660	female sex differentiation	Biological Process	2	1	3	0.00340844
GO:0051252	regulation of RNA metabolic process	Biological Process	11	2	13	0.00343417
GO:0001819	positive regulation of cytokine production	Biological Process	4	1	5	0.00343417
GO:0050900	leukocyte migration	Biological Process	4	1	5	0.00343417
GO:0006366	transcription by RNA polymerase II	Biological Process	9	2	11	0.00346999
GO:0006309	apoptotic DNA fragmentation	Biological Process	2	0	2	0.00346999
GO:0060561	apoptotic process involved in morphogenesis	Biological Process	2	0	2	0.00346999
GO:0051403	stress-activated MAPK cascade	Biological Process	3	1	4	0.00346999
GO:0045859	regulation of protein kinase activity	Biological Process	5	1	6	0.003474
GO:0071900	regulation of protein serine/threonine kinase activity	Biological Process	5	0	5	0.003474
GO:1901698	response to nitrogen compound	Biological Process	6	1	7	0.003474
GO:0007249	I-kappaB kinase/NF-kappaB signaling	Biological Process	4	0	4	0.00348217
GO:0030100	regulation of endocytosis	Biological Process	3	1	4	0.00352011
GO:0001525	angiogenesis	Biological Process	3	2	5	0.00359186
GO:0044271	cellular nitrogen compound biosynthetic process	Biological Process	12	3	15	0.00359186
GO:1903409	reactive oxygen species biosynthetic process	Biological Process	2	1	3	0.00362659
GO:0009059	macromolecule biosynthetic process	Biological Process	12	3	15	0.00364165
GO:0060396	growth hormone receptor signaling pathway	Biological Process	2	0	2	0.0036568
GO:0006352	DNA-templated transcription, initiation	Biological Process	3	1	4	0.0036568
GO:0008637	apoptotic mitochondrial changes	Biological Process	2	1	3	0.00367985
GO:0042592	homeostatic process	Biological Process	8	1	9	0.00382068
GO:0032502	developmental process	Biological Process	14	3	17	0.00388153
GO:0046885	regulation of hormone biosynthetic process	Biological Process	2	0	2	0.00390592
GO:0031334	positive regulation of protein complex assembly	Biological Process	3	1	4	0.00395284
GO:0060322	head development	Biological Process	5	1	6	0.00395284
GO:0031098	stress-activated protein kinase signaling cascade	Biological Process	3	1	4	0.00403693
GO:0070727	cellular macromolecule localization	Biological Process	7	2	9	0.00411315
GO:0034976	response to endoplasmic reticulum stress	Biological Process	2	2	4	0.00411879
GO:0071378	cellular response to growth hormone stimulus	Biological Process	2	0	2	0.00411879
GO:1902175	regulation of oxidative stress-induced intrinsic apoptotic signaling pathway	Biological Process	2	0	2	0.00411879
GO:0010605	negative regulation of macromolecule metabolic process	Biological Process	9	2	11	0.00411879
GO:0030968	endoplasmic reticulum unfolded protein response	Biological Process	2	1	3	0.00411879
GO:0051223	regulation of protein transport	Biological Process	5	0	5	0.00426595
GO:0002675	positive regulation of acute inflammatory response	Biological Process	2	0	2	0.00437508
GO:0002825	regulation of T-helper 1 type immune response	Biological Process	2	0	2	0.00437508
GO:0010954	positive regulation of protein processing	Biological Process	1	1	2	0.00437508
GO:0031328	positive regulation of cellular biosynthetic process	Biological Process	7	2	9	0.00451536
GO:0035239	tube morphogenesis	Biological Process	4	2	6	0.00461082
GO:0001782	B cell homeostasis	Biological Process	2	0	2	0.00463025
GO:0032770	positive regulation of monooxygenase activity	Biological Process	2	0	2	0.00463025
GO:0048147	negative regulation of fibroblast proliferation	Biological Process	2	0	2	0.00463025
GO:0050789	regulation of biological process	Biological Process	19	4	23	0.00465916
GO:0071901	negative regulation of protein serine/threonine kinase activity	Biological Process	3	0	3	0.00469381
GO:0050790	regulation of catalytic activity	Biological Process	8	2	10	0.00476375
GO:0042770	signal transduction in response to DNA damage	Biological Process	3	0	3	0.00476375
GO:0071482	cellular response to light stimulus	Biological Process	3	0	3	0.00476375
GO:0007399	nervous system development	Biological Process	8	2	10	0.00478941
GO:1900101	regulation of endoplasmic reticulum unfolded protein response	Biological Process	2	0	2	0.00485678
GO:1903319	positive regulation of protein maturation	Biological Process	1	1	2	0.00485678
GO:0000737	DNA catabolic process, endonucleolytic	Biological Process	2	0	2	0.00516471
GO:0090087	regulation of peptide transport	Biological Process	5	0	5	0.00535218
GO:0022411	cellular component disassembly	Biological Process	4	1	5	0.00542463
GO:0048660	regulation of smooth muscle cell proliferation	Biological Process	3	0	3	0.00542989
GO:0010165	response to X-ray	Biological Process	2	0	2	0.00543262
GO:0060251	regulation of glial cell proliferation	Biological Process	2	0	2	0.00543262
GO:0009416	response to light stimulus	Biological Process	4	0	4	0.00546289
GO:0071236	cellular response to antibiotic	Biological Process	2	1	3	0.00549251
GO:0051235	maintenance of location	Biological Process	4	0	4	0.00550084
GO:0032147	activation of protein kinase activity	Biological Process	4	0	4	0.00566709
GO:0048659	smooth muscle cell proliferation	Biological Process	3	0	3	0.00566709
GO:0030262	apoptotic nuclear changes	Biological Process	2	0	2	0.00566709
GO:0031572	G2 DNA damage checkpoint	Biological Process	2	0	2	0.00566709
GO:0046627	negative regulation of insulin receptor signaling pathway	Biological Process	2	0	2	0.00566709
GO:0051641	cellular localization	Biological Process	9	2	11	0.00570706
GO:0070201	regulation of establishment of protein localization	Biological Process	5	0	5	0.00578457
GO:0043524	negative regulation of neuron apoptotic process	Biological Process	3	0	3	0.00583312
GO:0043405	regulation of MAP kinase activity	Biological Process	4	0	4	0.00583327
GO:0034620	cellular response to unfolded protein	Biological Process	2	1	3	0.00592295
GO:0010831	positive regulation of myotube differentiation	Biological Process	1	1	2	0.00592827
GO:0032880	regulation of protein localization	Biological Process	5	1	6	0.00596332
GO:0043549	regulation of kinase activity	Biological Process	5	1	6	0.00596332
GO:0071902	positive regulation of protein serine/threonine kinase activity	Biological Process	4	0	4	0.00596471
GO:0051384	response to glucocorticoid	Biological Process	3	0	3	0.00597505
GO:1901342	regulation of vasculature development	Biological Process	4	0	4	0.00606362
GO:0001837	epithelial to mesenchymal transition	Biological Process	3	0	3	0.00606362
GO:0009411	response to UV	Biological Process	3	0	3	0.00606362
GO:0045834	positive regulation of lipid metabolic process	Biological Process	3	0	3	0.00606362
GO:0050871	positive regulation of B cell activation	Biological Process	2	1	3	0.00606362
GO:0044267	cellular protein metabolic process	Biological Process	12	3	15	0.00606362
GO:0006921	cellular component disassembly involved in execution phase of apoptosis	Biological Process	2	0	2	0.00606362
GO:0044818	mitotic G2/M transition checkpoint	Biological Process	2	0	2	0.00606362
GO:0045601	regulation of endothelial cell differentiation	Biological Process	2	0	2	0.00606362
GO:0051194	positive regulation of cofactor metabolic process	Biological Process	2	0	2	0.00606362
GO:0051385	response to mineralocorticoid	Biological Process	1	1	2	0.00606362
GO:1900077	negative regulation of cellular response to insulin stimulus	Biological Process	2	0	2	0.00606362
GO:2000045	regulation of G1/S transition of mitotic cell cycle	Biological Process	3	0	3	0.00615863
GO:0016070	RNA metabolic process	Biological Process	11	3	14	0.00619962
GO:0002369	T cell cytokine production	Biological Process	2	0	2	0.00634273
GO:0002724	regulation of T cell cytokine production	Biological Process	2	0	2	0.00634273
GO:0045807	positive regulation of endocytosis	Biological Process	2	1	3	0.00634273
GO:0002673	regulation of acute inflammatory response	Biological Process	2	1	3	0.00644895
GO:0019219	regulation of nucleobase-containing compound metabolic process	Biological Process	11	2	13	0.0065416
GO:0002822	regulation of adaptive immune response based on somatic recombination of immune receptors built from immunoglobulin superfamily domains	Biological Process	3	0	3	0.00654276
GO:0051179	localization	Biological Process	14	3	17	0.00658405
GO:0016572	histone phosphorylation	Biological Process	2	0	2	0.00659098
GO:0032965	regulation of collagen biosynthetic process	Biological Process	1	1	2	0.00659098
GO:1902742	apoptotic process involved in development	Biological Process	2	0	2	0.00659098
GO:0002262	myeloid cell homeostasis	Biological Process	3	0	3	0.00659699
GO:0033036	macromolecule localization	Biological Process	9	2	11	0.00665153
GO:0001101	response to acid chemical	Biological Process	3	1	4	0.00665153
GO:0010628	positive regulation of gene expression	Biological Process	5	4	9	0.00665153
GO:0032640	tumor necrosis factor production	Biological Process	2	1	3	0.00665153
GO:0032680	regulation of tumor necrosis factor production	Biological Process	2	1	3	0.00665153
GO:0046825	regulation of protein export from nucleus	Biological Process	2	0	2	0.00683089
GO:1905898	positive regulation of response to endoplasmic reticulum stress	Biological Process	2	0	2	0.00683089
GO:0007093	mitotic cell cycle checkpoint	Biological Process	3	0	3	0.0068555
GO:0065009	regulation of molecular function	Biological Process	9	2	11	0.0068555
GO:1902107	positive regulation of leukocyte differentiation	Biological Process	2	1	3	0.00695197
GO:0051147	regulation of muscle cell differentiation	Biological Process	2	1	3	0.00699724
GO:0051050	positive regulation of transport	Biological Process	5	1	6	0.00699724
GO:0045429	positive regulation of nitric oxide biosynthetic process	Biological Process	1	1	2	0.00699724
GO:1900117	regulation of execution phase of apoptosis	Biological Process	2	0	2	0.00699724
GO:0071706	tumor necrosis factor superfamily cytokine production	Biological Process	2	1	3	0.00699724
GO:1903555	regulation of tumor necrosis factor superfamily cytokine production	Biological Process	2	1	3	0.00699724
GO:0002460	adaptive immune response based on somatic recombination of immune receptors built from immunoglobulin superfamily domains	Biological Process	3	1	4	0.00699724
GO:0001315	age-dependent response to reactive oxygen species	Biological Process	1	0	1	0.00699724
GO:0003069	acetylcholine-mediated vasodilation involved in regulation of systemic arterial blood pressure	Biological Process	1	0	1	0.00699724
GO:0032976	release of matrix enzymes from mitochondria	Biological Process	1	0	1	0.00699724
GO:1902847	regulation of neuronal signal transduction	Biological Process	0	1	1	0.00699724
GO:1902998	positive regulation of neurofibrillary tangle assembly	Biological Process	0	1	1	0.00699724
GO:1905843	regulation of cellular response to gamma radiation	Biological Process	1	0	1	0.00699724
GO:1905891	regulation of cellular response to thapsigargin	Biological Process	0	1	1	0.00699724
GO:1905892	negative regulation of cellular response to thapsigargin	Biological Process	0	1	1	0.00699724
GO:1905894	regulation of cellular response to tunicamycin	Biological Process	0	1	1	0.00699724
GO:1905895	negative regulation of cellular response to tunicamycin	Biological Process	0	1	1	0.00699724
GO:1905917	positive regulation of cell differentiation involved in phenotypic switching	Biological Process	1	0	1	0.00699724
GO:1905932	positive regulation of vascular smooth muscle cell differentiation involved in phenotypic switching	Biological Process	1	0	1	0.00699724
GO:1990117	B cell receptor apoptotic signaling pathway	Biological Process	1	0	1	0.00699724
GO:2000549	positive regulation of dendritic cell dendrite assembly	Biological Process	1	0	1	0.00699724
GO:0060429	epithelium development	Biological Process	6	1	7	0.00699988
GO:0009892	negative regulation of metabolic process	Biological Process	9	2	11	0.00700728
GO:0061061	muscle structure development	Biological Process	4	1	5	0.00706798
GO:0060341	regulation of cellular localization	Biological Process	5	1	6	0.00706798
GO:0007259	JAK-STAT cascade	Biological Process	3	0	3	0.00706798
GO:0034250	positive regulation of cellular amide metabolic process	Biological Process	2	1	3	0.00706798
GO:0007257	activation of JUN kinase activity	Biological Process	2	0	2	0.00706798
GO:0032350	regulation of hormone metabolic process	Biological Process	2	0	2	0.00706798
GO:0060416	response to growth hormone	Biological Process	2	0	2	0.00706798
GO:1904407	positive regulation of nitric oxide metabolic process	Biological Process	1	1	2	0.00706798
GO:0044249	cellular biosynthetic process	Biological Process	13	3	16	0.00716416
GO:0006357	regulation of transcription by RNA polymerase II	Biological Process	9	1	10	0.00729701
GO:0032007	negative regulation of TOR signaling	Biological Process	2	0	2	0.00737399
GO:0032940	secretion by cell	Biological Process	5	2	7	0.00745922
GO:0035967	cellular response to topologically incorrect protein	Biological Process	2	1	3	0.00745922
GO:0097696	STAT cascade	Biological Process	3	0	3	0.00757249
GO:0010712	regulation of collagen metabolic process	Biological Process	1	1	2	0.00767039
GO:0002819	regulation of adaptive immune response	Biological Process	3	0	3	0.00767258
GO:0070613	regulation of protein processing	Biological Process	1	2	3	0.00778437
GO:0031324	negative regulation of cellular metabolic process	Biological Process	9	1	10	0.00778437
GO:0042129	regulation of T cell proliferation	Biological Process	3	0	3	0.00787461
GO:0048469	cell maturation	Biological Process	3	0	3	0.00787461
GO:0006464	cellular protein modification process	Biological Process	11	2	13	0.00791245
GO:0036211	protein modification process	Biological Process	11	2	13	0.00791245
GO:0008631	intrinsic apoptotic signaling pathway in response to oxidative stress	Biological Process	2	0	2	0.00791245
GO:1902806	regulation of cell cycle G1/S phase transition	Biological Process	3	0	3	0.00793329
GO:1903317	regulation of protein maturation	Biological Process	1	2	3	0.00793329
GO:0051093	negative regulation of developmental process	Biological Process	6	0	6	0.00803528
GO:1901576	organic substance biosynthetic process	Biological Process	13	3	16	0.00809487
GO:0042088	T-helper 1 type immune response	Biological Process	2	0	2	0.00812727
GO:1900408	negative regulation of cellular response to oxidative stress	Biological Process	2	0	2	0.00812727
GO:1903053	regulation of extracellular matrix organization	Biological Process	2	0	2	0.00812727
GO:1903202	negative regulation of oxidative stress-induced cell death	Biological Process	2	0	2	0.00812727
GO:2000107	negative regulation of leukocyte apoptotic process	Biological Process	2	0	2	0.00812727
GO:0048545	response to steroid hormone	Biological Process	3	1	4	0.00812727
GO:0060401	cytosolic calcium ion transport	Biological Process	2	1	3	0.00833077
GO:0043933	protein-containing complex subunit organization	Biological Process	8	1	9	0.00833522
GO:0030900	forebrain development	Biological Process	4	0	4	0.00847326
GO:0008104	protein localization	Biological Process	8	2	10	0.00851846
GO:0010638	positive regulation of organelle organization	Biological Process	4	1	5	0.00855959
GO:0030574	collagen catabolic process	Biological Process	1	1	2	0.00870912
GO:0032964	collagen biosynthetic process	Biological Process	1	1	2	0.00870912
GO:0035722	interleukin-12-mediated signaling pathway	Biological Process	2	0	2	0.00870912
GO:0050999	regulation of nitric-oxide synthase activity	Biological Process	2	0	2	0.00870912
GO:0044260	cellular macromolecule metabolic process	Biological Process	15	4	19	0.00870912
GO:0051649	establishment of localization in cell	Biological Process	8	1	9	0.00882839
GO:0006986	response to unfolded protein	Biological Process	2	1	3	0.00882839
GO:0045619	regulation of lymphocyte differentiation	Biological Process	2	1	3	0.00882839
GO:0002534	cytokine production involved in inflammatory response	Biological Process	2	0	2	0.00895259
GO:0090199	regulation of release of cytochrome c from mitochondria	Biological Process	1	1	2	0.00895259
GO:1900015	regulation of cytokine production involved in inflammatory response	Biological Process	2	0	2	0.00895259
GO:1902883	negative regulation of response to oxidative stress	Biological Process	2	0	2	0.00895259
GO:0001503	ossification	Biological Process	2	2	4	0.00895259
GO:0050673	epithelial cell proliferation	Biological Process	3	1	4	0.00895259
GO:0032501	multicellular organismal process	Biological Process	14	4	18	0.00896348
GO:0051338	regulation of transferase activity	Biological Process	5	1	6	0.00896348
GO:0034655	nucleobase-containing compound catabolic process	Biological Process	5	0	5	0.00904235
GO:0009058	biosynthetic process	Biological Process	13	3	16	0.00907856
GO:0050796	regulation of insulin secretion	Biological Process	3	0	3	0.00918827
GO:0010718	positive regulation of epithelial to mesenchymal transition	Biological Process	2	0	2	0.00918827
GO:0071349	cellular response to interleukin-12	Biological Process	2	0	2	0.00918827
GO:0010243	response to organonitrogen compound	Biological Process	5	1	6	0.00918827
GO:0009056	catabolic process	Biological Process	8	2	10	0.00922938
GO:0043123	positive regulation of I-kappaB kinase/NF-kappaB signaling	Biological Process	3	0	3	0.00927534
GO:0006692	prostanoid metabolic process	Biological Process	2	0	2	0.0094574
GO:0006693	prostaglandin metabolic process	Biological Process	2	0	2	0.0094574
GO:0006953	acute-phase response	Biological Process	2	0	2	0.0094574
GO:0070671	response to interleukin-12	Biological Process	2	0	2	0.0094574
GO:0010467	gene expression	Biological Process	11	4	15	0.00975705
GO:0048662	negative regulation of smooth muscle cell proliferation	Biological Process	2	0	2	0.00978588
GO:0061028	establishment of endothelial barrier	Biological Process	2	0	2	0.00978588
GO:0010821	regulation of mitochondrion organization	Biological Process	2	1	3	0.0098449
GO:1904018	positive regulation of vasculature development	Biological Process	3	0	3	0.0098449
GO:0009617	response to bacterium	Biological Process	5	0	5	0.00996396
GO:0001933	negative regulation of protein phosphorylation	Biological Process	4	0	4	0.00996396
GO:0002711	positive regulation of T cell mediated immunity	Biological Process	2	0	2	0.0100706
GO:0050731	positive regulation of peptidyl-tyrosine phosphorylation	Biological Process	3	0	3	0.0100706
GO:0009611	response to wounding	Biological Process	4	1	5	0.010534
GO:0033002	muscle cell proliferation	Biological Process	3	0	3	0.0107756
GO:0070231	T cell apoptotic process	Biological Process	2	0	2	0.0107756
GO:1903573	negative regulation of response to endoplasmic reticulum stress	Biological Process	1	1	2	0.0107756
GO:0071897	DNA biosynthetic process	Biological Process	2	1	3	0.0108854
GO:0048608	reproductive structure development	Biological Process	3	1	4	0.0110855
GO:0070228	regulation of lymphocyte apoptotic process	Biological Process	2	0	2	0.011118
GO:0030155	regulation of cell adhesion	Biological Process	4	1	5	0.0111985
GO:0070374	positive regulation of ERK1 and ERK2 cascade	Biological Process	2	1	3	0.011275
GO:0045785	positive regulation of cell adhesion	Biological Process	4	0	4	0.011275
GO:0061458	reproductive system development	Biological Process	3	1	4	0.011275
GO:0007169	transmembrane receptor protein tyrosine kinase signaling pathway	Biological Process	4	1	5	0.0113
GO:0048260	positive regulation of receptor-mediated endocytosis	Biological Process	1	1	2	0.0113
GO:0006955	immune response	Biological Process	8	1	9	0.0113
GO:0003012	muscle system process	Biological Process	3	1	4	0.0113
GO:0022414	reproductive process	Biological Process	5	2	7	0.0113
GO:0043412	macromolecule modification	Biological Process	11	2	13	0.0113
GO:0043030	regulation of macrophage activation	Biological Process	2	0	2	0.0113
GO:0043525	positive regulation of neuron apoptotic process	Biological Process	2	0	2	0.0113
GO:0000003	reproduction	Biological Process	5	2	7	0.0113
GO:1901215	negative regulation of neuron death	Biological Process	3	0	3	0.0113
GO:0001306	age-dependent response to oxidative stress	Biological Process	1	0	1	0.0113
GO:0002352	B cell negative selection	Biological Process	1	0	1	0.0113
GO:0002358	B cell homeostatic proliferation	Biological Process	1	0	1	0.0113
GO:0002384	hepatic immune response	Biological Process	1	0	1	0.0113
GO:0003068	regulation of systemic arterial blood pressure by acetylcholine	Biological Process	1	0	1	0.0113
GO:0003070	regulation of systemic arterial blood pressure by neurotransmitter	Biological Process	1	0	1	0.0113
GO:0007571	age-dependent general metabolic decline	Biological Process	1	0	1	0.0113
GO:0032625	interleukin-21 production	Biological Process	1	0	1	0.0113
GO:0032665	regulation of interleukin-21 production	Biological Process	1	0	1	0.0113
GO:0032745	positive regulation of interleukin-21 production	Biological Process	1	0	1	0.0113
GO:0035504	regulation of myosin light chain kinase activity	Biological Process	1	0	1	0.0113
GO:0035505	positive regulation of myosin light chain kinase activity	Biological Process	1	0	1	0.0113
GO:0060400	negative regulation of growth hormone receptor signaling pathway	Biological Process	1	0	1	0.0113
GO:0061741	chaperone-mediated protein transport involved in chaperone-mediated autophagy	Biological Process	0	1	1	0.0113
GO:0072434	signal transduction involved in mitotic G2 DNA damage checkpoint	Biological Process	1	0	1	0.0113
GO:1900241	positive regulation of phenotypic switching	Biological Process	1	0	1	0.0113
GO:1902631	negative regulation of membrane hyperpolarization	Biological Process	1	0	1	0.0113
GO:1902996	regulation of neurofibrillary tangle assembly	Biological Process	0	1	1	0.0113
GO:1903597	negative regulation of gap junction assembly	Biological Process	1	0	1	0.0113
GO:1904576	response to tunicamycin	Biological Process	0	1	1	0.0113
GO:1904577	cellular response to tunicamycin	Biological Process	0	1	1	0.0113
GO:1904868	telomerase catalytic core complex assembly	Biological Process	1	0	1	0.0113
GO:1904882	regulation of telomerase catalytic core complex assembly	Biological Process	1	0	1	0.0113
GO:1904884	positive regulation of telomerase catalytic core complex assembly	Biological Process	1	0	1	0.0113
GO:1905178	regulation of cardiac muscle tissue regeneration	Biological Process	1	0	1	0.0113
GO:1905179	negative regulation of cardiac muscle tissue regeneration	Biological Process	1	0	1	0.0113
GO:2001228	regulation of response to gamma radiation	Biological Process	1	0	1	0.0113
GO:0046903	secretion	Biological Process	5	2	7	0.0113048
GO:0048732	gland development	Biological Process	4	0	4	0.01141
GO:0046700	heterocycle catabolic process	Biological Process	5	0	5	0.01141
GO:0010830	regulation of myotube differentiation	Biological Process	1	1	2	0.01141
GO:0032768	regulation of monooxygenase activity	Biological Process	2	0	2	0.01141
GO:0045428	regulation of nitric oxide biosynthetic process	Biological Process	1	1	2	0.01141
GO:0051353	positive regulation of oxidoreductase activity	Biological Process	2	0	2	0.01141
GO:1904705	regulation of vascular smooth muscle cell proliferation	Biological Process	2	0	2	0.01141
GO:1990874	vascular smooth muscle cell proliferation	Biological Process	2	0	2	0.01141
GO:0044270	cellular nitrogen compound catabolic process	Biological Process	5	0	5	0.0114474
GO:0045935	positive regulation of nucleobase-containing compound metabolic process	Biological Process	7	1	8	0.0117358
GO:0032731	positive regulation of interleukin-1 beta production	Biological Process	2	0	2	0.0117473
GO:0006259	DNA metabolic process	Biological Process	5	1	6	0.0118026
GO:0034613	cellular protein localization	Biological Process	6	2	8	0.0119935
GO:0034284	response to monosaccharide	Biological Process	2	1	3	0.0120239
GO:0045184	establishment of protein localization	Biological Process	7	1	8	0.0120753
GO:0030073	insulin secretion	Biological Process	3	0	3	0.012146
GO:0019439	aromatic compound catabolic process	Biological Process	5	0	5	0.0121936
GO:0001817	regulation of cytokine production	Biological Process	4	1	5	0.0122321
GO:0043434	response to peptide hormone	Biological Process	3	1	4	0.0122321
GO:0009612	response to mechanical stimulus	Biological Process	2	1	3	0.0122321
GO:0051155	positive regulation of striated muscle cell differentiation	Biological Process	1	1	2	0.0123551
GO:0050870	positive regulation of T cell activation	Biological Process	3	0	3	0.0123551
GO:0002526	acute inflammatory response	Biological Process	2	1	3	0.0124871
GO:0001816	cytokine production	Biological Process	4	1	5	0.0124871
GO:0042326	negative regulation of phosphorylation	Biological Process	4	0	4	0.0126026
GO:0090276	regulation of peptide hormone secretion	Biological Process	3	0	3	0.0126026
GO:0002260	lymphocyte homeostasis	Biological Process	2	0	2	0.0129923
GO:0032757	positive regulation of interleukin-8 production	Biological Process	2	0	2	0.0129923
GO:0048247	lymphocyte chemotaxis	Biological Process	2	0	2	0.0129923
GO:0070059	intrinsic apoptotic signaling pathway in response to endoplasmic reticulum stress	Biological Process	2	0	2	0.0129923
GO:0007420	brain development	Biological Process	5	0	5	0.0130748
GO:0008406	gonad development	Biological Process	2	1	3	0.0133083
GO:0010564	regulation of cell cycle process	Biological Process	4	1	5	0.0133222
GO:0002720	positive regulation of cytokine production involved in immune response	Biological Process	2	0	2	0.0133222
GO:0030595	leukocyte chemotaxis	Biological Process	3	0	3	0.0134166
GO:0010001	glial cell differentiation	Biological Process	2	1	3	0.0135497
GO:0051129	negative regulation of cellular component organization	Biological Process	3	2	5	0.0135497
GO:0002066	columnar/cuboidal epithelial cell development	Biological Process	2	0	2	0.0135753
GO:0030888	regulation of B cell proliferation	Biological Process	2	0	2	0.0135753
GO:0042093	T-helper cell differentiation	Biological Process	2	0	2	0.0135753
GO:0046824	positive regulation of nucleocytoplasmic transport	Biological Process	2	0	2	0.0135753
GO:1903201	regulation of oxidative stress-induced cell death	Biological Process	2	0	2	0.0135753
GO:0048762	mesenchymal cell differentiation	Biological Process	3	0	3	0.0135753
GO:2001020	regulation of response to DNA damage stimulus	Biological Process	2	1	3	0.0135753
GO:0090304	nucleic acid metabolic process	Biological Process	11	3	14	0.0136231
GO:0009266	response to temperature stimulus	Biological Process	3	0	3	0.013704
GO:0002699	positive regulation of immune effector process	Biological Process	3	0	3	0.0138486
GO:0036498	IRE1-mediated unfolded protein response	Biological Process	2	0	2	0.0138486
GO:0046626	regulation of insulin receptor signaling pathway	Biological Process	2	0	2	0.0138486
GO:0002697	regulation of immune effector process	Biological Process	3	1	4	0.0138582
GO:1901361	organic cyclic compound catabolic process	Biological Process	5	0	5	0.0138758
GO:0045137	development of primary sexual characteristics	Biological Process	2	1	3	0.0139233
GO:0000082	G1/S transition of mitotic cell cycle	Biological Process	3	0	3	0.0140732
GO:0006139	nucleobase-containing compound metabolic process	Biological Process	12	3	15	0.0141419
GO:0002294	CD4-positive, alpha-beta T cell differentiation involved in immune response	Biological Process	2	0	2	0.0141419
GO:0002287	alpha-beta T cell activation involved in immune response	Biological Process	2	0	2	0.0144969
GO:0002293	alpha-beta T cell differentiation involved in immune response	Biological Process	2	0	2	0.0144969
GO:0035914	skeletal muscle cell differentiation	Biological Process	2	0	2	0.0144969
GO:0007050	cell cycle arrest	Biological Process	3	0	3	0.0146209
GO:0002532	production of molecular mediator involved in inflammatory response	Biological Process	2	0	2	0.0146209
GO:0042531	positive regulation of tyrosine phosphorylation of STAT protein	Biological Process	2	0	2	0.0146209
GO:0043507	positive regulation of JUN kinase activity	Biological Process	2	0	2	0.0146209
GO:0006469	negative regulation of protein kinase activity	Biological Process	3	0	3	0.0146209
GO:1901991	negative regulation of mitotic cell cycle phase transition	Biological Process	3	0	3	0.0146209
GO:1903039	positive regulation of leukocyte cell-cell adhesion	Biological Process	3	0	3	0.0146209
GO:0042110	T cell activation	Biological Process	4	0	4	0.0146209
GO:0051172	negative regulation of nitrogen compound metabolic process	Biological Process	8	1	9	0.0146209
GO:0001885	endothelial cell development	Biological Process	2	0	2	0.0146209
GO:0032732	positive regulation of interleukin-1 production	Biological Process	2	0	2	0.0146209
GO:0061180	mammary gland epithelium development	Biological Process	2	0	2	0.0146209
GO:0033157	regulation of intracellular protein transport	Biological Process	3	0	3	0.0146209
GO:1903706	regulation of hemopoiesis	Biological Process	3	1	4	0.0146209
GO:0002331	pre-B cell allelic exclusion	Biological Process	1	0	1	0.0146209
GO:0002904	positive regulation of B cell apoptotic process	Biological Process	1	0	1	0.0146209
GO:0006808	regulation of nitrogen utilization	Biological Process	1	0	1	0.0146209
GO:0021502	neural fold elevation formation	Biological Process	1	0	1	0.0146209
GO:0034021	response to silicon dioxide	Biological Process	1	0	1	0.0146209
GO:0034059	response to anoxia	Biological Process	0	1	1	0.0146209
GO:0048597	post-embryonic camera-type eye morphogenesis	Biological Process	1	0	1	0.0146209
GO:0060057	apoptotic process involved in mammary gland involution	Biological Process	1	0	1	0.0146209
GO:0060058	positive regulation of apoptotic process involved in mammary gland involution	Biological Process	1	0	1	0.0146209
GO:0060557	positive regulation of vitamin D biosynthetic process	Biological Process	1	0	1	0.0146209
GO:0060559	positive regulation of calcidiol 1-monooxygenase activity	Biological Process	1	0	1	0.0146209
GO:0061740	protein targeting to lysosome involved in chaperone-mediated autophagy	Biological Process	0	1	1	0.0146209
GO:0070101	positive regulation of chemokine-mediated signaling pathway	Biological Process	1	0	1	0.0146209
GO:0090679	cell differentiation involved in phenotypic switching	Biological Process	1	0	1	0.0146209
GO:0097026	dendritic cell dendrite assembly	Biological Process	1	0	1	0.0146209
GO:0097694	establishment of RNA localization to telomere	Biological Process	1	0	1	0.0146209
GO:0097695	establishment of protein-containing complex localization to telomere	Biological Process	1	0	1	0.0146209
GO:1902263	apoptotic process involved in embryonic digit morphogenesis	Biological Process	1	0	1	0.0146209
GO:1902445	regulation of mitochondrial membrane permeability involved in programmed necrotic cell death	Biological Process	1	0	1	0.0146209
GO:1902988	neurofibrillary tangle assembly	Biological Process	0	1	1	0.0146209
GO:1903519	regulation of mammary gland involution	Biological Process	1	0	1	0.0146209
GO:1903521	positive regulation of mammary gland involution	Biological Process	1	0	1	0.0146209
GO:1904578	response to thapsigargin	Biological Process	0	1	1	0.0146209
GO:1904579	cellular response to thapsigargin	Biological Process	0	1	1	0.0146209
GO:1905420	vascular smooth muscle cell differentiation involved in phenotypic switching	Biological Process	1	0	1	0.0146209
GO:1905915	regulation of cell differentiation involved in phenotypic switching	Biological Process	1	0	1	0.0146209
GO:1905930	regulation of vascular smooth muscle cell differentiation involved in phenotypic switching	Biological Process	1	0	1	0.0146209
GO:2000547	regulation of dendritic cell dendrite assembly	Biological Process	1	0	1	0.0146209
GO:2000634	regulation of primary miRNA processing	Biological Process	1	0	1	0.0146209
GO:2000635	negative regulation of primary miRNA processing	Biological Process	1	0	1	0.0146209
GO:0001894	tissue homeostasis	Biological Process	2	1	3	0.0146209
GO:0065008	regulation of biological quality	Biological Process	10	2	12	0.0147781
GO:0090398	cellular senescence	Biological Process	2	0	2	0.0147781
GO:0019538	protein metabolic process	Biological Process	12	3	15	0.0147781
GO:0042593	glucose homeostasis	Biological Process	3	0	3	0.0150561
GO:0006809	nitric oxide biosynthetic process	Biological Process	1	1	2	0.0151459
GO:0009743	response to carbohydrate	Biological Process	2	1	3	0.0151693
GO:0033500	carbohydrate homeostasis	Biological Process	3	0	3	0.0151693
GO:0045926	negative regulation of growth	Biological Process	3	0	3	0.0153229
GO:0048878	chemical homeostasis	Biological Process	6	0	6	0.0156197
GO:0051726	regulation of cell cycle	Biological Process	5	1	6	0.0157281
GO:0048871	multicellular organismal homeostasis	Biological Process	3	1	4	0.0157872
GO:0002292	T cell differentiation involved in immune response	Biological Process	2	0	2	0.015833
GO:0014015	positive regulation of gliogenesis	Biological Process	2	0	2	0.0161901
GO:0070227	lymphocyte apoptotic process	Biological Process	2	0	2	0.0161901
GO:1900076	regulation of cellular response to insulin stimulus	Biological Process	2	0	2	0.0161901
GO:0097305	response to alcohol	Biological Process	3	0	3	0.0163993
GO:1901988	negative regulation of cell cycle phase transition	Biological Process	3	0	3	0.0165495
GO:0043407	negative regulation of MAP kinase activity	Biological Process	2	0	2	0.0165495
GO:0030162	regulation of proteolysis	Biological Process	2	3	5	0.016645
GO:0044843	cell cycle G1/S phase transition	Biological Process	3	0	3	0.0168595
GO:0046209	nitric oxide metabolic process	Biological Process	1	1	2	0.0168894
GO:0072332	intrinsic apoptotic signaling pathway by p53 class mediator	Biological Process	2	0	2	0.0168894
GO:0031349	positive regulation of defense response	Biological Process	4	0	4	0.0170041
GO:2001057	reactive nitrogen species metabolic process	Biological Process	1	1	2	0.0172751
GO:0030072	peptide hormone secretion	Biological Process	3	0	3	0.0172815
GO:0043491	protein kinase B signaling	Biological Process	3	0	3	0.0172815
GO:0033673	negative regulation of kinase activity	Biological Process	3	0	3	0.0174232
GO:0050730	regulation of peptidyl-tyrosine phosphorylation	Biological Process	3	0	3	0.0174232
GO:0030217	T cell differentiation	Biological Process	3	0	3	0.017507
GO:0031100	animal organ regeneration	Biological Process	2	0	2	0.017507
GO:0034103	regulation of tissue remodeling	Biological Process	2	0	2	0.017507
GO:0048708	astrocyte differentiation	Biological Process	2	0	2	0.017507
GO:1900407	regulation of cellular response to oxidative stress	Biological Process	2	0	2	0.017507
GO:0046483	heterocycle metabolic process	Biological Process	12	3	15	0.0175955
GO:0051241	negative regulation of multicellular organismal process	Biological Process	6	0	6	0.0178225
GO:0002709	regulation of T cell mediated immunity	Biological Process	2	0	2	0.0178505
GO:0071260	cellular response to mechanical stimulus	Biological Process	2	0	2	0.0178505
GO:0050776	regulation of immune response	Biological Process	5	1	6	0.0179628
GO:0009636	response to toxic substance	Biological Process	4	0	4	0.0179628
GO:0042509	regulation of tyrosine phosphorylation of STAT protein	Biological Process	2	0	2	0.0179628
GO:0051205	protein insertion into membrane	Biological Process	2	0	2	0.0179628
GO:0001777	T cell homeostatic proliferation	Biological Process	1	0	1	0.0179628
GO:0001922	B-1 B cell homeostasis	Biological Process	1	0	1	0.0179628
GO:0002408	myeloid dendritic cell chemotaxis	Biological Process	1	0	1	0.0179628
GO:0003332	negative regulation of extracellular matrix constituent secretion	Biological Process	1	0	1	0.0179628
GO:0014805	smooth muscle adaptation	Biological Process	1	0	1	0.0179628
GO:0019740	nitrogen utilization	Biological Process	1	0	1	0.0179628
GO:0032286	central nervous system myelin maintenance	Biological Process	0	1	1	0.0179628
GO:0045917	positive regulation of complement activation	Biological Process	1	0	1	0.0179628
GO:0060355	positive regulation of cell adhesion molecule production	Biological Process	1	0	1	0.0179628
GO:0061030	epithelial cell differentiation involved in mammary gland alveolus development	Biological Process	1	0	1	0.0179628
GO:0061888	regulation of astrocyte activation	Biological Process	1	0	1	0.0179628
GO:0070164	negative regulation of adiponectin secretion	Biological Process	1	0	1	0.0179628
GO:0070318	positive regulation of G0 to G1 transition	Biological Process	0	1	1	0.0179628
GO:0071000	response to magnetism	Biological Process	1	0	1	0.0179628
GO:0071211	protein targeting to vacuole involved in autophagy	Biological Process	0	1	1	0.0179628
GO:0097029	mature conventional dendritic cell differentiation	Biological Process	1	0	1	0.0179628
GO:0097296	activation of cysteine-type endopeptidase activity involved in apoptotic signaling pathway	Biological Process	1	0	1	0.0179628
GO:1902202	regulation of hepatocyte growth factor receptor signaling pathway	Biological Process	1	0	1	0.0179628
GO:1902630	regulation of membrane hyperpolarization	Biological Process	1	0	1	0.0179628
GO:1905908	positive regulation of amyloid fibril formation	Biological Process	0	1	1	0.0179628
GO:2000259	positive regulation of protein activation cascade	Biological Process	1	0	1	0.0179628
GO:2000676	positive regulation of type B pancreatic cell apoptotic process	Biological Process	1	0	1	0.0179628
GO:0022008	neurogenesis	Biological Process	5	2	7	0.0179681
GO:1901652	response to peptide	Biological Process	3	1	4	0.0180676
GO:0019915	lipid storage	Biological Process	2	0	2	0.0180676
GO:0006725	cellular aromatic compound metabolic process	Biological Process	12	3	15	0.0182302
GO:0017144	drug metabolic process	Biological Process	4	1	5	0.0183353
GO:0051091	positive regulation of DNA-binding transcription factor activity	Biological Process	2	1	3	0.0183642
GO:0007260	tyrosine phosphorylation of STAT protein	Biological Process	2	0	2	0.0183642
GO:0008625	extrinsic apoptotic signaling pathway via death domain receptors	Biological Process	2	0	2	0.0183642
GO:1901224	positive regulation of NIK/NF-kappaB signaling	Biological Process	2	0	2	0.0183642
GO:0048872	homeostasis of number of cells	Biological Process	3	0	3	0.0184853
GO:0007267	cell-cell signaling	Biological Process	7	0	7	0.018525
GO:0060627	regulation of vesicle-mediated transport	Biological Process	3	1	4	0.0186389
GO:0009791	post-embryonic development	Biological Process	2	0	2	0.0186389
GO:0032637	interleukin-8 production	Biological Process	2	0	2	0.0186389
GO:0032677	regulation of interleukin-8 production	Biological Process	2	0	2	0.0186389
GO:0043367	CD4-positive, alpha-beta T cell differentiation	Biological Process	2	0	2	0.0186389
GO:0051962	positive regulation of nervous system development	Biological Process	4	0	4	0.0188202
GO:0043506	regulation of JUN kinase activity	Biological Process	2	0	2	0.0190267
GO:0036473	cell death in response to oxidative stress	Biological Process	2	0	2	0.0194172
GO:0046889	positive regulation of lipid biosynthetic process	Biological Process	2	0	2	0.0194172
GO:0046883	regulation of hormone secretion	Biological Process	3	0	3	0.0195775
GO:0042446	hormone biosynthetic process	Biological Process	2	0	2	0.0198105
GO:0021700	developmental maturation	Biological Process	3	0	3	0.0199218
GO:0007548	sex differentiation	Biological Process	2	1	3	0.0200712
GO:0022409	positive regulation of cell-cell adhesion	Biological Process	3	0	3	0.0200712
GO:1902882	regulation of response to oxidative stress	Biological Process	2	0	2	0.0201585
GO:0050708	regulation of protein secretion	Biological Process	3	0	3	0.0204197
GO:0007005	mitochondrion organization	Biological Process	3	1	4	0.0204292
GO:0018193	peptidyl-amino acid modification	Biological Process	6	0	6	0.0205388
GO:0060485	mesenchyme development	Biological Process	3	0	3	0.0207468
GO:0050778	positive regulation of immune response	Biological Process	4	1	5	0.0210253
GO:1902105	regulation of leukocyte differentiation	Biological Process	2	1	3	0.0210253
GO:1903827	regulation of cellular protein localization	Biological Process	3	1	4	0.0210253
GO:0032611	interleukin-1 beta production	Biological Process	2	0	2	0.0210253
GO:0032651	regulation of interleukin-1 beta production	Biological Process	2	0	2	0.0210253
GO:0032755	positive regulation of interleukin-6 production	Biological Process	2	0	2	0.0210253
GO:0046427	positive regulation of JAK-STAT cascade	Biological Process	2	0	2	0.0210253
GO:0007507	heart development	Biological Process	4	0	4	0.0210253
GO:0072331	signal transduction by p53 class mediator	Biological Process	3	0	3	0.0210253
GO:0002023	reduction of food intake in response to dietary excess	Biological Process	1	0	1	0.0210253
GO:0002329	pre-B cell differentiation	Biological Process	1	0	1	0.0210253
GO:0002339	B cell selection	Biological Process	1	0	1	0.0210253
GO:0002434	immune complex clearance	Biological Process	0	1	1	0.0210253
GO:0010729	positive regulation of hydrogen peroxide biosynthetic process	Biological Process	1	0	1	0.0210253
GO:0033092	positive regulation of immature T cell proliferation in thymus	Biological Process	1	0	1	0.0210253
GO:0046136	positive regulation of vitamin metabolic process	Biological Process	1	0	1	0.0210253
GO:0060011	Sertoli cell proliferation	Biological Process	1	0	1	0.0210253
GO:0070487	monocyte aggregation	Biological Process	1	0	1	0.0210253
GO:0090261	positive regulation of inclusion body assembly	Biological Process	0	1	1	0.0210253
GO:0090677	reversible differentiation	Biological Process	1	0	1	0.0210253
GO:0097411	hypoxia-inducible factor-1alpha signaling pathway	Biological Process	1	0	1	0.0210253
GO:1902262	apoptotic process involved in blood vessel morphogenesis	Biological Process	1	0	1	0.0210253
GO:1903377	negative regulation of oxidative stress-induced neuron intrinsic apoptotic signaling pathway	Biological Process	1	0	1	0.0210253
GO:1990834	response to odorant	Biological Process	0	1	1	0.0210253
GO:2000660	negative regulation of interleukin-1-mediated signaling pathway	Biological Process	1	0	1	0.0210253
GO:0010035	response to inorganic substance	Biological Process	4	0	4	0.0211645
GO:0070542	response to fatty acid	Biological Process	1	1	2	0.021193
GO:0010717	regulation of epithelial to mesenchymal transition	Biological Process	2	0	2	0.0216163
GO:1903530	regulation of secretion by cell	Biological Process	4	0	4	0.0219179
GO:0002367	cytokine production involved in immune response	Biological Process	2	0	2	0.0219179
GO:0002718	regulation of cytokine production involved in immune response	Biological Process	2	0	2	0.0219179
GO:0031058	positive regulation of histone modification	Biological Process	2	0	2	0.0219179
GO:0045582	positive regulation of T cell differentiation	Biological Process	2	0	2	0.0219179
GO:1904894	positive regulation of STAT cascade	Biological Process	2	0	2	0.0219179
GO:1903047	mitotic cell cycle process	Biological Process	5	0	5	0.021964
GO:0045936	negative regulation of phosphate metabolic process	Biological Process	4	0	4	0.021964
GO:0010563	negative regulation of phosphorus metabolic process	Biological Process	4	0	4	0.0220713
GO:0071356	cellular response to tumor necrosis factor	Biological Process	3	0	3	0.0222447
GO:0002690	positive regulation of leukocyte chemotaxis	Biological Process	2	0	2	0.0222447
GO:0048232	male gamete generation	Biological Process	3	1	4	0.0222617
GO:0051348	negative regulation of transferase activity	Biological Process	3	0	3	0.0223754
GO:0090287	regulation of cellular response to growth factor stimulus	Biological Process	3	0	3	0.0225568
GO:0097194	execution phase of apoptosis	Biological Process	2	0	2	0.0225975
GO:0034599	cellular response to oxidative stress	Biological Process	3	0	3	0.023316
GO:0060326	cell chemotaxis	Biological Process	3	0	3	0.023316
GO:0010972	negative regulation of G2/M transition of mitotic cell cycle	Biological Process	2	0	2	0.0234363
GO:0044057	regulation of system process	Biological Process	3	1	4	0.023571
GO:0040007	growth	Biological Process	4	1	5	0.0237765
GO:0006303	double-strand break repair via nonhomologous end joining	Biological Process	2	0	2	0.0237934
GO:0032006	regulation of TOR signaling	Biological Process	2	0	2	0.0237934
GO:0045765	regulation of angiogenesis	Biological Process	3	0	3	0.0238223
GO:0033043	regulation of organelle organization	Biological Process	4	2	6	0.0238223
GO:0032091	negative regulation of protein binding	Biological Process	2	0	2	0.0238223
GO:0002248	connective tissue replacement involved in inflammatory response wound healing	Biological Process	1	0	1	0.0238223
GO:0033091	positive regulation of immature T cell proliferation	Biological Process	1	0	1	0.0238223
GO:0033591	response to L-ascorbic acid	Biological Process	1	0	1	0.0238223
GO:0035234	ectopic germ cell programmed cell death	Biological Process	1	0	1	0.0238223
GO:0035744	T-helper 1 cell cytokine production	Biological Process	1	0	1	0.0238223
GO:0045627	positive regulation of T-helper 1 cell differentiation	Biological Process	1	0	1	0.0238223
GO:0046666	retinal cell programmed cell death	Biological Process	1	0	1	0.0238223
GO:0060398	regulation of growth hormone receptor signaling pathway	Biological Process	1	0	1	0.0238223
GO:0061026	cardiac muscle tissue regeneration	Biological Process	1	0	1	0.0238223
GO:0061419	positive regulation of transcription from RNA polymerase II promoter in response to hypoxia	Biological Process	1	0	1	0.0238223
GO:0061470	T follicular helper cell differentiation	Biological Process	1	0	1	0.0238223
GO:0070162	adiponectin secretion	Biological Process	1	0	1	0.0238223
GO:0070163	regulation of adiponectin secretion	Biological Process	1	0	1	0.0238223
GO:0071500	cellular response to nitrosative stress	Biological Process	1	0	1	0.0238223
GO:0072679	thymocyte migration	Biological Process	1	0	1	0.0238223
GO:1900239	regulation of phenotypic switching	Biological Process	1	0	1	0.0238223
GO:1902949	positive regulation of tau-protein kinase activity	Biological Process	0	1	1	0.0238223
GO:1903898	negative regulation of PERK-mediated unfolded protein response	Biological Process	1	0	1	0.0238223
GO:1905323	telomerase holoenzyme complex assembly	Biological Process	1	0	1	0.0238223
GO:2000554	regulation of T-helper 1 cell cytokine production	Biological Process	1	0	1	0.0238223
GO:2000556	positive regulation of T-helper 1 cell cytokine production	Biological Process	1	0	1	0.0238223
GO:2000669	negative regulation of dendritic cell apoptotic process	Biological Process	1	0	1	0.0238223
GO:2001015	negative regulation of skeletal muscle cell differentiation	Biological Process	1	0	1	0.0238223
GO:0015031	protein transport	Biological Process	6	1	7	0.0238779
GO:0051222	positive regulation of protein transport	Biological Process	3	0	3	0.0238779
GO:1901360	organic cyclic compound metabolic process	Biological Process	12	3	15	0.0238779
GO:1901575	organic substance catabolic process	Biological Process	7	1	8	0.0238779
GO:0030593	neutrophil chemotaxis	Biological Process	2	0	2	0.0238779
GO:0070498	interleukin-1-mediated signaling pathway	Biological Process	2	0	2	0.0238779
GO:0045930	negative regulation of mitotic cell cycle	Biological Process	3	0	3	0.0240187
GO:0018105	peptidyl-serine phosphorylation	Biological Process	3	0	3	0.0242045
GO:0002456	T cell mediated immunity	Biological Process	2	0	2	0.0242312
GO:0042136	neurotransmitter biosynthetic process	Biological Process	1	1	2	0.0242312
GO:1901564	organonitrogen compound metabolic process	Biological Process	13	3	16	0.0244465
GO:0002791	regulation of peptide secretion	Biological Process	3	0	3	0.0245257
GO:0019725	cellular homeostasis	Biological Process	5	0	5	0.0245593
GO:0035710	CD4-positive, alpha-beta T cell activation	Biological Process	2	0	2	0.0245593
GO:0051153	regulation of striated muscle cell differentiation	Biological Process	1	1	2	0.0245593
GO:0045786	negative regulation of cell cycle	Biological Process	4	0	4	0.0246077
GO:0002250	adaptive immune response	Biological Process	3	1	4	0.0247211
GO:0051341	regulation of oxidoreductase activity	Biological Process	2	0	2	0.0249141
GO:1901888	regulation of cell junction assembly	Biological Process	1	1	2	0.0249141
GO:0071396	cellular response to lipid	Biological Process	3	1	4	0.0249224
GO:0034612	response to tumor necrosis factor	Biological Process	3	0	3	0.0255801
GO:0043500	muscle adaptation	Biological Process	2	0	2	0.0257346
GO:0048640	negative regulation of developmental growth	Biological Process	2	0	2	0.0257346
GO:0031400	negative regulation of protein modification process	Biological Process	4	0	4	0.0258092
GO:0046879	hormone secretion	Biological Process	3	0	3	0.0259086
GO:0000726	non-recombinational repair	Biological Process	2	0	2	0.0260383
GO:0002708	positive regulation of lymphocyte mediated immunity	Biological Process	2	0	2	0.0260383
GO:0032612	interleukin-1 production	Biological Process	2	0	2	0.0260383
GO:0032652	regulation of interleukin-1 production	Biological Process	2	0	2	0.0260383
GO:0015833	peptide transport	Biological Process	6	1	7	0.0263723
GO:1903037	regulation of leukocyte cell-cell adhesion	Biological Process	3	0	3	0.0263723
GO:0000425	pexophagy	Biological Process	1	0	1	0.0263723
GO:0001842	neural fold formation	Biological Process	1	0	1	0.0263723
GO:0002246	wound healing involved in inflammatory response	Biological Process	1	0	1	0.0263723
GO:0002606	positive regulation of dendritic cell antigen processing and presentation	Biological Process	1	0	1	0.0263723
GO:0008635	activation of cysteine-type endopeptidase activity involved in apoptotic process by cytochrome c	Biological Process	1	0	1	0.0263723
GO:0010726	positive regulation of hydrogen peroxide metabolic process	Biological Process	1	0	1	0.0263723
GO:0031077	post-embryonic camera-type eye development	Biological Process	1	0	1	0.0263723
GO:0031394	positive regulation of prostaglandin biosynthetic process	Biological Process	1	0	1	0.0263723
GO:0031622	positive regulation of fever generation	Biological Process	1	0	1	0.0263723
GO:0036166	phenotypic switching	Biological Process	1	0	1	0.0263723
GO:0043615	astrocyte cell migration	Biological Process	0	1	1	0.0263723
GO:0048050	post-embryonic eye morphogenesis	Biological Process	1	0	1	0.0263723
GO:0051597	response to methylmercury	Biological Process	1	0	1	0.0263723
GO:0060558	regulation of calcidiol 1-monooxygenase activity	Biological Process	1	0	1	0.0263723
GO:1905065	positive regulation of vascular smooth muscle cell differentiation	Biological Process	1	0	1	0.0263723
GO:1905461	positive regulation of vascular associated smooth muscle cell apoptotic process	Biological Process	1	0	1	0.0263723
GO:2000646	positive regulation of receptor catabolic process	Biological Process	1	0	1	0.0263723
GO:0030449	regulation of complement activation	Biological Process	1	1	2	0.0263723
GO:0048259	regulation of receptor-mediated endocytosis	Biological Process	1	1	2	0.0263723
GO:1902750	negative regulation of cell cycle G2/M phase transition	Biological Process	2	0	2	0.0263723
GO:0007346	regulation of mitotic cell cycle	Biological Process	4	0	4	0.0264889
GO:0032496	response to lipopolysaccharide	Biological Process	3	0	3	0.0266831
GO:0010557	positive regulation of macromolecule biosynthetic process	Biological Process	6	1	7	0.0269056
GO:0002286	T cell activation involved in immune response	Biological Process	2	0	2	0.0271416
GO:0046822	regulation of nucleocytoplasmic transport	Biological Process	2	0	2	0.0271416
GO:2001022	positive regulation of response to DNA damage stimulus	Biological Process	2	0	2	0.0271416
GO:0045446	endothelial cell differentiation	Biological Process	2	0	2	0.0275282
GO:0046632	alpha-beta T cell differentiation	Biological Process	2	0	2	0.0275282
GO:2000278	regulation of DNA biosynthetic process	Biological Process	2	0	2	0.0275282
GO:0071375	cellular response to peptide hormone stimulus	Biological Process	3	0	3	0.0275733
GO:0009914	hormone transport	Biological Process	3	0	3	0.027713
GO:0018209	peptidyl-serine modification	Biological Process	3	0	3	0.027713
GO:0051188	cofactor biosynthetic process	Biological Process	3	0	3	0.027713
GO:0006807	nitrogen compound metabolic process	Biological Process	16	4	20	0.027713
GO:0046677	response to antibiotic	Biological Process	2	1	3	0.0280793
GO:0050863	regulation of T cell activation	Biological Process	3	0	3	0.0280793
GO:0051046	regulation of secretion	Biological Process	4	0	4	0.028104
GO:0016485	protein processing	Biological Process	1	2	3	0.0282487
GO:0042886	amide transport	Biological Process	6	1	7	0.028262
GO:0051234	establishment of localization	Biological Process	11	2	13	0.028405
GO:0006629	lipid metabolic process	Biological Process	5	1	6	0.028538
GO:0002702	positive regulation of production of molecular mediator of immune response	Biological Process	2	0	2	0.0287646
GO:0006096	glycolytic process	Biological Process	2	0	2	0.0287646
GO:0014902	myotube differentiation	Biological Process	1	1	2	0.0287646
GO:0072676	lymphocyte migration	Biological Process	2	0	2	0.0287646
GO:1901222	regulation of NIK/NF-kappaB signaling	Biological Process	2	0	2	0.0287646
GO:0042742	defense response to bacterium	Biological Process	3	0	3	0.0287646
GO:0072330	monocarboxylic acid biosynthetic process	Biological Process	3	0	3	0.0287646
GO:0002314	germinal center B cell differentiation	Biological Process	1	0	1	0.0287646
GO:0006975	DNA damage induced protein phosphorylation	Biological Process	1	0	1	0.0287646
GO:0035900	response to isolation stress	Biological Process	1	0	1	0.0287646
GO:0036480	neuron intrinsic apoptotic signaling pathway in response to oxidative stress	Biological Process	1	0	1	0.0287646
GO:0048087	positive regulation of developmental pigmentation	Biological Process	1	0	1	0.0287646
GO:0051541	elastin metabolic process	Biological Process	1	0	1	0.0287646
GO:0061518	microglial cell proliferation	Biological Process	0	1	1	0.0287646
GO:0070244	negative regulation of thymocyte apoptotic process	Biological Process	1	0	1	0.0287646
GO:0071493	cellular response to UV-B	Biological Process	1	0	1	0.0287646
GO:0072321	chaperone-mediated protein transport	Biological Process	0	1	1	0.0287646
GO:0090091	positive regulation of extracellular matrix disassembly	Biological Process	1	0	1	0.0287646
GO:0090400	stress-induced premature senescence	Biological Process	1	0	1	0.0287646
GO:1903376	regulation of oxidative stress-induced neuron intrinsic apoptotic signaling pathway	Biological Process	1	0	1	0.0287646
GO:1904354	negative regulation of telomere capping	Biological Process	1	0	1	0.0287646
GO:1990264	peptidyl-tyrosine dephosphorylation involved in inactivation of protein kinase activity	Biological Process	1	0	1	0.0287646
GO:2000659	regulation of interleukin-1-mediated signaling pathway	Biological Process	1	0	1	0.0287646
GO:0006757	ATP generation from ADP	Biological Process	2	0	2	0.0288165
GO:0021782	glial cell development	Biological Process	1	1	2	0.0288165
GO:2000257	regulation of protein activation cascade	Biological Process	1	1	2	0.0288165
GO:0010948	negative regulation of cell cycle process	Biological Process	3	0	3	0.0289851
GO:0002237	response to molecule of bacterial origin	Biological Process	3	0	3	0.0293916
GO:0007049	cell cycle	Biological Process	6	1	7	0.0293916
GO:0002274	myeloid leukocyte activation	Biological Process	3	1	4	0.0293985
GO:1904951	positive regulation of establishment of protein localization	Biological Process	3	0	3	0.0295344
GO:0034605	cellular response to heat	Biological Process	2	0	2	0.0295344
GO:0048593	camera-type eye morphogenesis	Biological Process	2	0	2	0.0295344
GO:0051209	release of sequestered calcium ion into cytosol	Biological Process	2	0	2	0.0295344
GO:0043170	macromolecule metabolic process	Biological Process	15	4	19	0.0295803
GO:0006508	proteolysis	Biological Process	4	3	7	0.0295988
GO:0040008	regulation of growth	Biological Process	3	1	4	0.0296552
GO:0022402	cell cycle process	Biological Process	5	1	6	0.0298077
GO:0033559	unsaturated fatty acid metabolic process	Biological Process	2	0	2	0.0298077
GO:0042866	pyruvate biosynthetic process	Biological Process	2	0	2	0.0298077
GO:0051283	negative regulation of sequestering of calcium ion	Biological Process	2	0	2	0.0298077
GO:0032787	monocarboxylic acid metabolic process	Biological Process	4	0	4	0.0301096
GO:0006913	nucleocytoplasmic transport	Biological Process	3	0	3	0.0301096
GO:0002688	regulation of leukocyte chemotaxis	Biological Process	2	0	2	0.0301096
GO:0022612	gland morphogenesis	Biological Process	2	0	2	0.0301096
GO:0031929	TOR signaling	Biological Process	2	0	2	0.0301096
GO:1990266	neutrophil migration	Biological Process	2	0	2	0.0301096
GO:0051193	regulation of cofactor metabolic process	Biological Process	2	0	2	0.0305278
GO:0051282	regulation of sequestering of calcium ion	Biological Process	2	0	2	0.0305278
GO:0051169	nuclear transport	Biological Process	3	0	3	0.030621
GO:0007155	cell adhesion	Biological Process	4	2	6	0.0306831
GO:0009057	macromolecule catabolic process	Biological Process	5	1	6	0.0306831
GO:0042493	response to drug	Biological Process	5	0	5	0.0306831
GO:0010822	positive regulation of mitochondrion organization	Biological Process	2	0	2	0.0306831
GO:0022610	biological adhesion	Biological Process	4	2	6	0.0306831
GO:0071621	granulocyte chemotaxis	Biological Process	2	0	2	0.0306831
GO:0001781	neutrophil apoptotic process	Biological Process	1	0	1	0.0306831
GO:0010728	regulation of hydrogen peroxide biosynthetic process	Biological Process	1	0	1	0.0306831
GO:0023041	neuronal signal transduction	Biological Process	0	1	1	0.0306831
GO:0031620	regulation of fever generation	Biological Process	1	0	1	0.0306831
GO:0032471	negative regulation of endoplasmic reticulum calcium ion concentration	Biological Process	1	0	1	0.0306831
GO:0032906	transforming growth factor beta2 production	Biological Process	1	0	1	0.0306831
GO:0032909	regulation of transforming growth factor beta2 production	Biological Process	1	0	1	0.0306831
GO:0036289	peptidyl-serine autophosphorylation	Biological Process	1	0	1	0.0306831
GO:0043653	mitochondrial fragmentation involved in apoptotic process	Biological Process	1	0	1	0.0306831
GO:0045136	development of secondary sexual characteristics	Biological Process	1	0	1	0.0306831
GO:0048563	post-embryonic animal organ morphogenesis	Biological Process	1	0	1	0.0306831
GO:0060056	mammary gland involution	Biological Process	1	0	1	0.0306831
GO:0060556	regulation of vitamin D biosynthetic process	Biological Process	1	0	1	0.0306831
GO:0061072	iris morphogenesis	Biological Process	1	0	1	0.0306831
GO:0071550	death-inducing signaling complex assembly	Biological Process	1	0	1	0.0306831
GO:0071763	nuclear membrane organization	Biological Process	1	0	1	0.0306831
GO:1903596	regulation of gap junction assembly	Biological Process	1	0	1	0.0306831
GO:1905288	vascular associated smooth muscle cell apoptotic process	Biological Process	1	0	1	0.0306831
GO:1905459	regulation of vascular associated smooth muscle cell apoptotic process	Biological Process	1	0	1	0.0306831
GO:2000553	positive regulation of T-helper 2 cell cytokine production	Biological Process	1	0	1	0.0306831
GO:2001054	negative regulation of mesenchymal cell apoptotic process	Biological Process	1	0	1	0.0306831
GO:2001280	positive regulation of unsaturated fatty acid biosynthetic process	Biological Process	1	0	1	0.0306831
GO:0044703	multi-organism reproductive process	Biological Process	4	1	5	0.03084
GO:0002449	lymphocyte mediated immunity	Biological Process	2	1	3	0.0309098
GO:0006690	icosanoid metabolic process	Biological Process	2	0	2	0.0309963
GO:0014013	regulation of gliogenesis	Biological Process	2	0	2	0.0309963
GO:0007159	leukocyte cell-cell adhesion	Biological Process	3	0	3	0.0312866
GO:0002065	columnar/cuboidal epithelial cell differentiation	Biological Process	2	0	2	0.0313541
GO:0048565	digestive tract development	Biological Process	2	0	2	0.0313541
GO:0051208	sequestering of calcium ion	Biological Process	2	0	2	0.0313541
GO:0042692	muscle cell differentiation	Biological Process	2	1	3	0.0314031
GO:0007167	enzyme linked receptor protein signaling pathway	Biological Process	4	1	5	0.0315142
GO:0034641	cellular nitrogen compound metabolic process	Biological Process	12	3	15	0.0315142
GO:0045087	innate immune response	Biological Process	4	1	5	0.0315935
GO:0046031	ADP metabolic process	Biological Process	2	0	2	0.0316832
GO:0009887	animal organ morphogenesis	Biological Process	3	2	5	0.0322587
GO:0000278	mitotic cell cycle	Biological Process	5	0	5	0.0324725
GO:0044248	cellular catabolic process	Biological Process	7	1	8	0.0325774
GO:0003158	endothelium development	Biological Process	2	0	2	0.0328469
GO:0009306	protein secretion	Biological Process	3	0	3	0.0328469
GO:0072657	protein localization to membrane	Biological Process	3	1	4	0.0328469
GO:0003006	developmental process involved in reproduction	Biological Process	3	1	4	0.0328469
GO:0035690	cellular response to drug	Biological Process	3	0	3	0.0328469
GO:0002579	positive regulation of antigen processing and presentation	Biological Process	1	0	1	0.0328469
GO:0003330	regulation of extracellular matrix constituent secretion	Biological Process	1	0	1	0.0328469
GO:0031392	regulation of prostaglandin biosynthetic process	Biological Process	1	0	1	0.0328469
GO:0033084	regulation of immature T cell proliferation in thymus	Biological Process	1	0	1	0.0328469
GO:0035860	glial cell-derived neurotrophic factor receptor signaling pathway	Biological Process	1	0	1	0.0328469
GO:0045141	meiotic telomere clustering	Biological Process	1	0	1	0.0328469
GO:0045625	regulation of T-helper 1 cell differentiation	Biological Process	1	0	1	0.0328469
GO:0048642	negative regulation of skeletal muscle tissue development	Biological Process	1	0	1	0.0328469
GO:0051409	response to nitrosative stress	Biological Process	1	0	1	0.0328469
GO:0060068	vagina development	Biological Process	1	0	1	0.0328469
GO:0060353	regulation of cell adhesion molecule production	Biological Process	1	0	1	0.0328469
GO:0070091	glucagon secretion	Biological Process	1	0	1	0.0328469
GO:0070092	regulation of glucagon secretion	Biological Process	1	0	1	0.0328469
GO:0070099	regulation of chemokine-mediated signaling pathway	Biological Process	1	0	1	0.0328469
GO:0097048	dendritic cell apoptotic process	Biological Process	1	0	1	0.0328469
GO:1903054	negative regulation of extracellular matrix organization	Biological Process	1	0	1	0.0328469
GO:1903715	regulation of aerobic respiration	Biological Process	1	0	1	0.0328469
GO:2000668	regulation of dendritic cell apoptotic process	Biological Process	1	0	1	0.0328469
GO:2000674	regulation of type B pancreatic cell apoptotic process	Biological Process	1	0	1	0.0328469
GO:0006886	intracellular protein transport	Biological Process	4	1	5	0.033538
GO:0002920	regulation of humoral immune response	Biological Process	1	1	2	0.0336391
GO:1905269	positive regulation of chromatin organization	Biological Process	2	0	2	0.0336391
GO:0018108	peptidyl-tyrosine phosphorylation	Biological Process	3	0	3	0.0336391
GO:0071496	cellular response to external stimulus	Biological Process	3	0	3	0.0336391
GO:0018212	peptidyl-tyrosine modification	Biological Process	3	0	3	0.034329
GO:0006165	nucleoside diphosphate phosphorylation	Biological Process	2	0	2	0.0345038
GO:0044255	cellular lipid metabolic process	Biological Process	5	0	5	0.0345753
GO:0006959	humoral immune response	Biological Process	2	1	3	0.0347209
GO:0002705	positive regulation of leukocyte mediated immunity	Biological Process	2	0	2	0.0348038
GO:0042552	myelination	Biological Process	1	1	2	0.0348038
GO:0043280	positive regulation of cysteine-type endopeptidase activity involved in apoptotic process	Biological Process	1	1	2	0.0348038
GO:0055123	digestive system development	Biological Process	2	0	2	0.0348038
GO:0046939	nucleotide phosphorylation	Biological Process	2	0	2	0.0348869
GO:0001660	fever generation	Biological Process	1	0	1	0.0348869
GO:0002604	regulation of dendritic cell antigen processing and presentation	Biological Process	1	0	1	0.0348869
GO:0010248	establishment or maintenance of transmembrane electrochemical gradient	Biological Process	1	0	1	0.0348869
GO:0010269	response to selenium ion	Biological Process	1	0	1	0.0348869
GO:0031652	positive regulation of heat generation	Biological Process	1	0	1	0.0348869
GO:0032308	positive regulation of prostaglandin secretion	Biological Process	1	0	1	0.0348869
GO:0033080	immature T cell proliferation in thymus	Biological Process	1	0	1	0.0348869
GO:0034397	telomere localization	Biological Process	1	0	1	0.0348869
GO:0040015	negative regulation of multicellular organism growth	Biological Process	1	0	1	0.0348869
GO:0042541	hemoglobin biosynthetic process	Biological Process	1	0	1	0.0348869
GO:0043619	regulation of transcription from RNA polymerase II promoter in response to oxidative stress	Biological Process	1	0	1	0.0348869
GO:0061517	macrophage proliferation	Biological Process	0	1	1	0.0348869
GO:0071044	histone mRNA catabolic process	Biological Process	1	0	1	0.0348869
GO:0071492	cellular response to UV-A	Biological Process	1	0	1	0.0348869
GO:0090220	chromosome localization to nuclear envelope involved in homologous chromosome segregation	Biological Process	1	0	1	0.0348869
GO:0097050	type B pancreatic cell apoptotic process	Biological Process	1	0	1	0.0348869
GO:0097709	connective tissue replacement	Biological Process	1	0	1	0.0348869
GO:1902947	regulation of tau-protein kinase activity	Biological Process	0	1	1	0.0348869
GO:1903800	positive regulation of production of miRNAs involved in gene silencing by miRNA	Biological Process	1	0	1	0.0348869
GO:1903897	regulation of PERK-mediated unfolded protein response	Biological Process	1	0	1	0.0348869
GO:1905907	negative regulation of amyloid fibril formation	Biological Process	0	1	1	0.0348869
GO:2000434	regulation of protein neddylation	Biological Process	1	0	1	0.0348869
GO:2000644	regulation of receptor catabolic process	Biological Process	1	0	1	0.0348869
GO:2001053	regulation of mesenchymal cell apoptotic process	Biological Process	1	0	1	0.0348869
GO:2001269	positive regulation of cysteine-type endopeptidase activity involved in apoptotic signaling pathway	Biological Process	1	0	1	0.0348869
GO:0007272	ensheathment of neurons	Biological Process	1	1	2	0.0349127
GO:0008366	axon ensheathment	Biological Process	1	1	2	0.0349127
GO:0032635	interleukin-6 production	Biological Process	2	0	2	0.0352712
GO:0032675	regulation of interleukin-6 production	Biological Process	2	0	2	0.0352712
GO:0042542	response to hydrogen peroxide	Biological Process	2	0	2	0.0352712
GO:1903531	negative regulation of secretion by cell	Biological Process	2	0	2	0.0352712
GO:0007276	gamete generation	Biological Process	3	1	4	0.0354157
GO:0000724	double-strand break repair via homologous recombination	Biological Process	2	0	2	0.0356301
GO:0009135	purine nucleoside diphosphate metabolic process	Biological Process	2	0	2	0.0356301
GO:0009179	purine ribonucleoside diphosphate metabolic process	Biological Process	2	0	2	0.0356301
GO:0010629	negative regulation of gene expression	Biological Process	6	1	7	0.0357926
GO:0030879	mammary gland development	Biological Process	2	0	2	0.0359893
GO:0035264	multicellular organism growth	Biological Process	2	0	2	0.0359893
GO:0046425	regulation of JAK-STAT cascade	Biological Process	2	0	2	0.0359893
GO:0051248	negative regulation of protein metabolic process	Biological Process	4	1	5	0.036341
GO:0000725	recombinational repair	Biological Process	2	0	2	0.036349
GO:0008286	insulin receptor signaling pathway	Biological Process	2	0	2	0.036349
GO:0097553	calcium ion transmembrane import into cytosol	Biological Process	2	0	2	0.036349
GO:1901653	cellular response to peptide	Biological Process	3	0	3	0.0366182
GO:0008584	male gonad development	Biological Process	1	1	2	0.0367402
GO:0009185	ribonucleoside diphosphate metabolic process	Biological Process	2	0	2	0.0367402
GO:0019216	regulation of lipid metabolic process	Biological Process	3	0	3	0.0367704
GO:0033135	regulation of peptidyl-serine phosphorylation	Biological Process	2	0	2	0.0367894
GO:0046546	development of primary male sexual characteristics	Biological Process	1	1	2	0.0367894
GO:0050921	positive regulation of chemotaxis	Biological Process	2	0	2	0.0367894
GO:0001768	establishment of T cell polarity	Biological Process	1	0	1	0.0367894
GO:0002327	immature B cell differentiation	Biological Process	1	0	1	0.0367894
GO:0006002	fructose 6-phosphate metabolic process	Biological Process	1	0	1	0.0367894
GO:0010917	negative regulation of mitochondrial membrane potential	Biological Process	1	0	1	0.0367894
GO:0030242	autophagy of peroxisome	Biological Process	1	0	1	0.0367894
GO:0030656	regulation of vitamin metabolic process	Biological Process	1	0	1	0.0367894
GO:0032966	negative regulation of collagen biosynthetic process	Biological Process	1	0	1	0.0367894
GO:0033083	regulation of immature T cell proliferation	Biological Process	1	0	1	0.0367894
GO:0042368	vitamin D biosynthetic process	Biological Process	1	0	1	0.0367894
GO:0060452	positive regulation of cardiac muscle contraction	Biological Process	0	1	1	0.0367894
GO:0090154	positive regulation of sphingolipid biosynthetic process	Biological Process	1	0	1	0.0367894
GO:0097152	mesenchymal cell apoptotic process	Biological Process	1	0	1	0.0367894
GO:2000304	positive regulation of ceramide biosynthetic process	Biological Process	1	0	1	0.0367894
GO:2001279	regulation of unsaturated fatty acid biosynthetic process	Biological Process	1	0	1	0.0367894
GO:1904892	regulation of STAT cascade	Biological Process	2	0	2	0.0371162
GO:0019359	nicotinamide nucleotide biosynthetic process	Biological Process	2	0	2	0.0384817
GO:0019363	pyridine nucleotide biosynthetic process	Biological Process	2	0	2	0.0384817
GO:0097530	granulocyte migration	Biological Process	2	0	2	0.0384817
GO:0060041	retina development in camera-type eye	Biological Process	2	0	2	0.0389407
GO:0002790	peptide secretion	Biological Process	3	0	3	0.0389472
GO:0051604	protein maturation	Biological Process	1	2	3	0.0389472
GO:0001767	establishment of lymphocyte polarity	Biological Process	1	0	1	0.0389472
GO:0001976	neurological system process involved in regulation of systemic arterial blood pressure	Biological Process	1	0	1	0.0389472
GO:0009886	post-embryonic animal morphogenesis	Biological Process	1	0	1	0.0389472
GO:0010623	programmed cell death involved in cell development	Biological Process	1	0	1	0.0389472
GO:0010713	negative regulation of collagen metabolic process	Biological Process	1	0	1	0.0389472
GO:0030213	hyaluronan biosynthetic process	Biological Process	1	0	1	0.0389472
GO:0032306	regulation of prostaglandin secretion	Biological Process	1	0	1	0.0389472
GO:0032494	response to peptidoglycan	Biological Process	1	0	1	0.0389472
GO:0033079	immature T cell proliferation	Biological Process	1	0	1	0.0389472
GO:0035745	T-helper 2 cell cytokine production	Biological Process	1	0	1	0.0389472
GO:0036092	phosphatidylinositol-3-phosphate biosynthetic process	Biological Process	1	0	1	0.0389472
GO:0045837	negative regulation of membrane potential	Biological Process	1	0	1	0.0389472
GO:0051152	positive regulation of smooth muscle cell differentiation	Biological Process	1	0	1	0.0389472
GO:0060352	cell adhesion molecule production	Biological Process	1	0	1	0.0389472
GO:0070243	regulation of thymocyte apoptotic process	Biological Process	1	0	1	0.0389472
GO:0070486	leukocyte aggregation	Biological Process	1	0	1	0.0389472
GO:0071481	cellular response to X-ray	Biological Process	1	0	1	0.0389472
GO:0072425	signal transduction involved in G2 DNA damage checkpoint	Biological Process	1	0	1	0.0389472
GO:0090594	inflammatory response to wounding	Biological Process	1	0	1	0.0389472
GO:2000551	regulation of T-helper 2 cell cytokine production	Biological Process	1	0	1	0.0389472
GO:0001935	endothelial cell proliferation	Biological Process	1	1	2	0.0391463
GO:0072525	pyridine-containing compound biosynthetic process	Biological Process	2	0	2	0.0391463
GO:0031056	regulation of histone modification	Biological Process	2	0	2	0.0400295
GO:0062013	positive regulation of small molecule metabolic process	Biological Process	2	0	2	0.0400295
GO:2001056	positive regulation of cysteine-type endopeptidase activity	Biological Process	1	1	2	0.0400295
GO:0006090	pyruvate metabolic process	Biological Process	2	0	2	0.040391
GO:0030856	regulation of epithelial cell differentiation	Biological Process	2	0	2	0.040391
GO:0042133	neurotransmitter metabolic process	Biological Process	1	1	2	0.040391
GO:0045580	regulation of T cell differentiation	Biological Process	2	0	2	0.040391
GO:0002706	regulation of lymphocyte mediated immunity	Biological Process	2	0	2	0.0409468
GO:0046631	alpha-beta T cell activation	Biological Process	2	0	2	0.0409468
GO:0048592	eye morphogenesis	Biological Process	2	0	2	0.0409468
GO:0001771	immunological synapse formation	Biological Process	1	0	1	0.0409468
GO:0002468	dendritic cell antigen processing and presentation	Biological Process	1	0	1	0.0409468
GO:0030948	negative regulation of vascular endothelial growth factor receptor signaling pathway	Biological Process	1	0	1	0.0409468
GO:0031053	primary miRNA processing	Biological Process	1	0	1	0.0409468
GO:0031650	regulation of heat generation	Biological Process	1	0	1	0.0409468
GO:0032725	positive regulation of granulocyte macrophage colony-stimulating factor production	Biological Process	1	0	1	0.0409468
GO:0033089	positive regulation of T cell differentiation in thymus	Biological Process	1	0	1	0.0409468
GO:0034393	positive regulation of smooth muscle cell apoptotic process	Biological Process	1	0	1	0.0409468
GO:0048070	regulation of developmental pigmentation	Biological Process	1	0	1	0.0409468
GO:0060081	membrane hyperpolarization	Biological Process	1	0	1	0.0409468
GO:0060397	JAK-STAT cascade involved in growth hormone signaling pathway	Biological Process	1	0	1	0.0409468
GO:0070141	response to UV-A	Biological Process	1	0	1	0.0409468
GO:0071639	positive regulation of monocyte chemotactic protein-1 production	Biological Process	1	0	1	0.0409468
GO:0072540	T-helper 17 cell lineage commitment	Biological Process	1	0	1	0.0409468
GO:1903799	negative regulation of production of miRNAs involved in gene silencing by miRNA	Biological Process	1	0	1	0.0409468
GO:1905906	regulation of amyloid fibril formation	Biological Process	0	1	1	0.0409468
GO:1901990	regulation of mitotic cell cycle phase transition	Biological Process	3	0	3	0.0409468
GO:0045893	positive regulation of transcription, DNA-templated	Biological Process	5	1	6	0.0411064
GO:1903508	positive regulation of nucleic acid-templated transcription	Biological Process	5	1	6	0.0411064
GO:1902680	positive regulation of RNA biosynthetic process	Biological Process	5	1	6	0.0411877
GO:1901137	carbohydrate derivative biosynthetic process	Biological Process	4	0	4	0.0411913
GO:0010876	lipid localization	Biological Process	2	1	3	0.0412639
GO:0044238	primary metabolic process	Biological Process	16	4	20	0.0412639
GO:0001678	cellular glucose homeostasis	Biological Process	2	0	2	0.0414396
GO:0007519	skeletal muscle tissue development	Biological Process	2	0	2	0.0414396
GO:0009408	response to heat	Biological Process	2	0	2	0.0418998
GO:0071695	anatomical structure maturation	Biological Process	2	0	2	0.0423467
GO:0006816	calcium ion transport	Biological Process	2	1	3	0.0423467
GO:0030099	myeloid cell differentiation	Biological Process	3	0	3	0.0423467
GO:0051345	positive regulation of hydrolase activity	Biological Process	3	1	4	0.0424917
GO:0060402	calcium ion transport into cytosol	Biological Process	2	0	2	0.0427237
GO:0051090	regulation of DNA-binding transcription factor activity	Biological Process	2	1	3	0.0429851
GO:0009132	nucleoside diphosphate metabolic process	Biological Process	2	0	2	0.0429851
GO:0034614	cellular response to reactive oxygen species	Biological Process	2	0	2	0.0429851
GO:0090316	positive regulation of intracellular protein transport	Biological Process	2	0	2	0.0429851
GO:0010715	regulation of extracellular matrix disassembly	Biological Process	1	0	1	0.0429851
GO:0035791	platelet-derived growth factor receptor-beta signaling pathway	Biological Process	1	0	1	0.0429851
GO:0042362	fat-soluble vitamin biosynthetic process	Biological Process	1	0	1	0.0429851
GO:0045579	positive regulation of B cell differentiation	Biological Process	0	1	1	0.0429851
GO:0048012	hepatocyte growth factor receptor signaling pathway	Biological Process	1	0	1	0.0429851
GO:1905063	regulation of vascular smooth muscle cell differentiation	Biological Process	1	0	1	0.0429851
GO:0030855	epithelial cell differentiation	Biological Process	4	0	4	0.0429851
GO:0022407	regulation of cell-cell adhesion	Biological Process	3	0	3	0.0431723
GO:0002700	regulation of production of molecular mediator of immune response	Biological Process	2	0	2	0.0432776
GO:0006754	ATP biosynthetic process	Biological Process	2	0	2	0.0436391
GO:0051048	negative regulation of secretion	Biological Process	2	0	2	0.0436391
GO:0051092	positive regulation of NF-kappaB transcription factor activity	Biological Process	1	1	2	0.0436391
GO:1905952	regulation of lipid localization	Biological Process	2	0	2	0.0436391
GO:0045944	positive regulation of transcription by RNA polymerase II	Biological Process	4	1	5	0.0439403
GO:0051100	negative regulation of binding	Biological Process	2	0	2	0.0440695
GO:0032386	regulation of intracellular transport	Biological Process	3	0	3	0.0442077
GO:0046661	male sex differentiation	Biological Process	1	1	2	0.044501
GO:0034248	regulation of cellular amide metabolic process	Biological Process	2	1	3	0.0446661
GO:0006089	lactate metabolic process	Biological Process	1	0	1	0.0447579
GO:0019896	axonal transport of mitochondrion	Biological Process	1	0	1	0.0447579
GO:0020027	hemoglobin metabolic process	Biological Process	1	0	1	0.0447579
GO:0030540	female genitalia development	Biological Process	1	0	1	0.0447579
GO:0032310	prostaglandin secretion	Biological Process	1	0	1	0.0447579
GO:0032604	granulocyte macrophage colony-stimulating factor production	Biological Process	1	0	1	0.0447579
GO:0032645	regulation of granulocyte macrophage colony-stimulating factor production	Biological Process	1	0	1	0.0447579
GO:0033151	V(D)J recombination	Biological Process	1	0	1	0.0447579
GO:0034116	positive regulation of heterotypic cell-cell adhesion	Biological Process	1	0	1	0.0447579
GO:0042159	lipoprotein catabolic process	Biological Process	1	0	1	0.0447579
GO:0043217	myelin maintenance	Biological Process	0	1	1	0.0447579
GO:0045989	positive regulation of striated muscle contraction	Biological Process	0	1	1	0.0447579
GO:0051044	positive regulation of membrane protein ectodomain proteolysis	Biological Process	1	0	1	0.0447579
GO:0061298	retina vasculature development in camera-type eye	Biological Process	1	0	1	0.0447579
GO:0061684	chaperone-mediated autophagy	Biological Process	0	1	1	0.0447579
GO:0071361	cellular response to ethanol	Biological Process	1	0	1	0.0447579
GO:1900102	negative regulation of endoplasmic reticulum unfolded protein response	Biological Process	1	0	1	0.0447579
GO:1901741	positive regulation of myoblast fusion	Biological Process	1	0	1	0.0447579
GO:1904262	negative regulation of TORC1 signaling	Biological Process	1	0	1	0.0447579
GO:0060538	skeletal muscle organ development	Biological Process	2	0	2	0.0452748
GO:0044237	cellular metabolic process	Biological Process	16	4	20	0.0454831
GO:0006665	sphingolipid metabolic process	Biological Process	2	0	2	0.0457062
GO:0043409	negative regulation of MAPK cascade	Biological Process	2	0	2	0.046174
GO:0046394	carboxylic acid biosynthetic process	Biological Process	3	0	3	0.0464862
GO:0016053	organic acid biosynthetic process	Biological Process	3	0	3	0.0466076
GO:0045766	positive regulation of angiogenesis	Biological Process	2	0	2	0.0466076
GO:0071705	nitrogen compound transport	Biological Process	6	1	7	0.0466076
GO:0002830	positive regulation of type 2 immune response	Biological Process	1	0	1	0.0466076
GO:0006978	DNA damage response, signal transduction by p53 class mediator resulting in transcription of p21 class mediator	Biological Process	1	0	1	0.0466076
GO:0010224	response to UV-B	Biological Process	1	0	1	0.0466076
GO:0010829	negative regulation of glucose transmembrane transport	Biological Process	1	0	1	0.0466076
GO:0016264	gap junction assembly	Biological Process	1	0	1	0.0466076
GO:0030730	sequestering of triglyceride	Biological Process	1	0	1	0.0466076
GO:0033599	regulation of mammary gland epithelial cell proliferation	Biological Process	1	0	1	0.0466076
GO:0043517	positive regulation of DNA damage response, signal transduction by p53 class mediator	Biological Process	1	0	1	0.0466076
GO:0045779	negative regulation of bone resorption	Biological Process	1	0	1	0.0466076
GO:0048569	post-embryonic animal organ development	Biological Process	1	0	1	0.0466076
GO:0050665	hydrogen peroxide biosynthetic process	Biological Process	1	0	1	0.0466076
GO:0060644	mammary gland epithelial cell differentiation	Biological Process	1	0	1	0.0466076
GO:0070230	positive regulation of lymphocyte apoptotic process	Biological Process	1	0	1	0.0466076
GO:0071850	mitotic cell cycle arrest	Biological Process	1	0	1	0.0466076
GO:0090083	regulation of inclusion body assembly	Biological Process	0	1	1	0.0466076
GO:1900221	regulation of amyloid-beta clearance	Biological Process	0	1	1	0.0466076
GO:2001267	regulation of cysteine-type endopeptidase activity involved in apoptotic signaling pathway	Biological Process	1	0	1	0.0466076
GO:0006810	transport	Biological Process	10	2	12	0.0466076
GO:0003008	system process	Biological Process	6	1	7	0.0467443
GO:0023061	signal release	Biological Process	3	0	3	0.0467443
GO:0009206	purine ribonucleoside triphosphate biosynthetic process	Biological Process	2	0	2	0.0473031
GO:0007088	regulation of mitotic nuclear division	Biological Process	2	0	2	0.0477003
GO:0009145	purine nucleoside triphosphate biosynthetic process	Biological Process	2	0	2	0.0477003
GO:0038061	NIK/NF-kappaB signaling	Biological Process	2	0	2	0.0477003
GO:0006956	complement activation	Biological Process	1	1	2	0.0481339
GO:0071346	cellular response to interferon-gamma	Biological Process	2	0	2	0.0481339
GO:1901987	regulation of cell cycle phase transition	Biological Process	3	0	3	0.04838
GO:0046890	regulation of lipid biosynthetic process	Biological Process	2	0	2	0.048465
GO:0002295	T-helper cell lineage commitment	Biological Process	1	0	1	0.048465
GO:0002902	regulation of B cell apoptotic process	Biological Process	1	0	1	0.048465
GO:0030889	negative regulation of B cell proliferation	Biological Process	1	0	1	0.048465
GO:0031643	positive regulation of myelination	Biological Process	1	0	1	0.048465
GO:0031649	heat generation	Biological Process	1	0	1	0.048465
GO:0032305	positive regulation of icosanoid secretion	Biological Process	1	0	1	0.048465
GO:0042772	DNA damage response, signal transduction resulting in transcription	Biological Process	1	0	1	0.048465
GO:0043691	reverse cholesterol transport	Biological Process	0	1	1	0.048465
GO:0051895	negative regulation of focal adhesion assembly	Biological Process	0	1	1	0.048465
GO:0060965	negative regulation of gene silencing by miRNA	Biological Process	1	0	1	0.048465
GO:1902004	positive regulation of amyloid-beta formation	Biological Process	0	1	1	0.048465
GO:1902430	negative regulation of amyloid-beta formation	Biological Process	0	1	1	0.048465
GO:2000303	regulation of ceramide biosynthetic process	Biological Process	1	0	1	0.048465
GO:0010950	positive regulation of endopeptidase activity	Biological Process	1	1	2	0.0484975
GO:0030324	lung development	Biological Process	0	2	2	0.0484975
GO:0051897	positive regulation of protein kinase B signaling	Biological Process	2	0	2	0.0484975
GO:0051254	positive regulation of RNA metabolic process	Biological Process	5	1	6	0.0485954
GO:1901568	fatty acid derivative metabolic process	Biological Process	2	0	2	0.0489117
GO:0055082	cellular chemical homeostasis	Biological Process	4	0	4	0.0489117
GO:0009201	ribonucleoside triphosphate biosynthetic process	Biological Process	2	0	2	0.0493274
GO:0051053	negative regulation of DNA metabolic process	Biological Process	2	0	2	0.0493274
Table S2 KEGG analysis
ID	Descrption	class	Up	Down	num	qvalue
ko04668	TNF signaling pathway	Environmental Information Processing	4	2	6	5.38e-05
ko05166	HTLV-I infection	Human Diseases	5	1	6	0.00105
ko05163	Human cytomegalovirus infection	Human Diseases	5	1	6	0.00105
ko04210	Apoptosis	Cellular Processes	5	0	5	0.00105
ko04064	NF-kappa B signaling pathway	Environmental Information Processing	5	0	5	0.00188
ko05020	Prion diseases	Human Diseases	3	0	3	0.00188
ko04060	Cytokine-cytokine receptor interaction	Environmental Information Processing	6	0	6	0.00188
ko04657	IL-17 signaling pathway	Organismal Systems	4	0	4	0.00188
ko05167	Kaposi sarcoma-associated herpesvirus infection	Human Diseases	5	0	5	0.00188
ko04061	Viral protein interaction with cytokine and cytokine receptor	Environmental Information Processing	4	0	4	0.00188
ko04931	Insulin resistance	Human Diseases	3	1	4	0.00273
ko04066	HIF-1 signaling pathway	Environmental Information Processing	4	0	4	0.00315
ko05131	Shigellosis	Human Diseases	5	0	5	0.00458
ko04068	FoxO signaling pathway	Environmental Information Processing	4	0	4	0.00458
ko05202	Transcriptional misregulation in cancers	Human Diseases	5	0	5	0.00556
ko04932	Non-alcoholic fatty liver disease (NAFLD)	Human Diseases	4	0	4	0.00641
ko04115	p53 signaling pathway	Cellular Processes	3	0	3	0.00641
ko04217	Necroptosis	Cellular Processes	4	0	4	0.00641
ko05161	Hepatitis B	Human Diseases	3	1	4	0.00641
ko05323	Rheumatoid arthritis	Human Diseases	4	0	4	0.00641
ko01524	Platinum drug resistance	Human Diseases	3	0	3	0.00677
ko05164	Influenza A	Human Diseases	4	0	4	0.00755
ko05165	Human papillomavirus infection	Human Diseases	4	1	5	0.0115
ko04211	Longevity regulating pathway - mammal	Organismal Systems	2	1	3	0.0117
ko04933	AGE-RAGE signaling pathway in diabetic complications	Human Diseases	3	0	3	0.0142
ko05132	Salmonella infection	Human Diseases	4	0	4	0.0146
ko04928	Parathyroid hormone synthesis, secretion and action	Organismal Systems	1	2	3	0.0149
ko05142	Chagas disease (American trypanosomiasis)	Human Diseases	3	0	3	0.0149
ko01523	Antifolate resistance	Human Diseases	2	0	2	0.0151
ko04659	Th17 cell differentiation	Organismal Systems	3	0	3	0.0154
ko04215	Apoptosis - multiple species	Cellular Processes	2	0	2	0.016
ko05332	Graft-versus-host disease	Human Diseases	2	0	2	0.0185
ko05152	Tuberculosis	Human Diseases	4	0	4	0.0189
ko05216	Thyroid cancer	Human Diseases	2	0	2	0.0193
ko05219	Bladder cancer	Human Diseases	2	0	2	0.0228
ko05130	Pathogenic Escherichia coli infection	Human Diseases	4	0	4	0.025
ko05162	Measles	Human Diseases	3	0	3	0.0276
ko05160	Hepatitis C	Human Diseases	3	0	3	0.0338
ko04218	Cellular senescence	Cellular Processes	3	0	3	0.0338
ko05144	Malaria	Human Diseases	2	0	2	0.0338
ko05014	Amyotrophic lateral sclerosis (ALS)	Human Diseases	2	0	2	0.0356
ko05134	Legionellosis	Human Diseases	2	0	2	0.0356
ko05213	Endometrial cancer	Human Diseases	2	0	2	0.0402
ko04623	Cytosolic DNA-sensing pathway	Organismal Systems	2	0	2	0.0402
ko05217	Basal cell carcinoma	Human Diseases	2	0	2	0.0402
ko05200	Pathways in cancer	Human Diseases	5	0	5	0.0415
ko00524	Neomycin, kanamycin and gentamicin biosynthesis	Metabolism	1	0	1	0.0415
ko05223	Non-small cell lung cancer	Human Diseases	2	0	2	0.0438
ko05321	Inflammatiory bowel disease (IBD)	Human Diseases	2	0	2	0.0438
ko05230	Central carbon metabolism in cancer	Human Diseases	2	0	2	0.0474
ko05211	Renal cell carcinoma	Human Diseases	2	0	2	0.0474
ko05218	Melanoma	Human Diseases	2	0	2	0.0474
ko05203	Viral carcinogenesis	Human Diseases	2	1	3	0.0474
ko05133	Pertussis	Human Diseases	2	0	2	0.0481
ko05214	Glioma	Human Diseases	2	0	2	0.0481
ko05220	Chronic myeloid leukemia	Human Diseases	2	0	2	0.0481
ko05212	Pancreatic cancer	Human Diseases	2	0	2	0.0496
Table S3 miRNA prediction
geneName	miRNAname	miRNA-target predicting programs
		PITA	RNA22	miRmap	microT	miRanda	PicTar	TargetScan
CDKN1A	hsa-let-7a-5p	1	0	0	1	1	0	1
	hsa-let-7b-5p	1	0	0	1	1	0	1
	hsa-let-7c-5p	1	0	0	1	1	0	1
	hsa-let-7e-5p	1	0	0	1	1	0	1
	hsa-let-7f-5p	1	0	0	1	1	0	1
	hsa-miR-17-5p	1	0	1	1	1	1	1
	hsa-miR-17-5p	1	0	1	1	1	0	1
	hsa-miR-20a-5p	1	0	1	1	1	1	1
	hsa-miR-20a-5p	1	0	1	1	1	0	1
	hsa-miR-22-3p	1	0	1	0	1	1	0
	hsa-miR-28-5p	1	0	1	1	1	0	0
	hsa-miR-28-5p	1	0	1	1	1	0	0
	hsa-miR-93-5p	1	0	1	1	1	1	1
	hsa-miR-93-5p	1	0	1	1	1	0	1
	hsa-miR-98-5p	1	0	0	1	1	0	1
	hsa-miR-106a-5p	1	0	1	1	1	1	1
	hsa-miR-106a-5p	1	0	1	1	1	0	1
	hsa-miR-224-5p	1	0	1	1	1	0	0
	hsa-let-7g-5p	1	0	0	1	1	0	1
	hsa-let-7i-5p	1	0	0	1	1	0	1
	hsa-miR-130a-3p	1	0	0	1	1	0	1
	hsa-miR-106b-5p	1	0	1	1	1	1	1
	hsa-miR-106b-5p	1	0	1	1	1	0	1
	hsa-miR-301a-3p	1	0	0	1	1	0	1
	hsa-miR-130b-3p	1	0	0	1	1	0	1
	hsa-miR-365a-3p	1	0	1	1	1	0	0
	hsa-miR-370-3p	1	0	1	1	1	0	1
	hsa-miR-20b-5p	1	0	1	1	1	1	1
	hsa-miR-20b-5p	1	0	1	1	1	0	1
	hsa-miR-485-5p	1	0	1	0	1	0	1
	hsa-miR-526b-3p	0	0	1	1	0	1	1
	hsa-miR-519d-3p	1	0	1	1	1	1	1
	hsa-miR-519d-3p	1	0	1	1	1	0	1
	hsa-miR-499a-5p	1	0	0	1	0	1	1
	hsa-miR-454-3p	1	0	0	1	1	0	1
	hsa-miR-708-5p	1	0	1	1	1	0	0
	hsa-miR-708-5p	1	0	1	1	1	0	0
	hsa-miR-301b-3p	1	0	0	1	1	0	1
HIF1A	hsa-miR-17-5p	1	0	1	1	1	1	1
	hsa-miR-18a-5p	1	0	1	1	1	1	1
	hsa-miR-18a-5p	1	0	1	1	1	0	0
	hsa-miR-19a-3p	1	0	0	0	1	1	1
	hsa-miR-19b-3p	1	0	0	0	1	1	1
	hsa-miR-20a-5p	1	0	1	0	1	1	1
	hsa-miR-93-5p	1	0	1	1	1	1	1
	hsa-miR-106a-5p	1	0	1	0	1	1	1
	hsa-miR-199a-5p	1	0	1	0	1	1	1
	hsa-miR-199b-5p	1	0	1	0	1	0	1
	hsa-miR-135a-5p	1	0	1	0	1	1	1
	hsa-miR-138-5p	1	0	0	0	1	1	1
	hsa-miR-155-5p	1	0	0	0	1	1	1
	hsa-miR-106b-5p	1	0	1	0	1	1	1
	hsa-miR-376c-3p	1	0	1	1	1	0	0
	hsa-miR-376c-3p	1	0	1	1	1	0	0
	hsa-miR-151a-3p	1	0	1	0	0	1	1
	hsa-miR-135b-5p	1	0	1	0	1	0	1
	hsa-miR-338-3p	1	0	1	1	1	0	0
	hsa-miR-18b-5p	1	0	1	1	1	0	1
	hsa-miR-18b-5p	1	0	1	1	1	0	0
	hsa-miR-20b-5p	1	0	1	1	1	1	1
	hsa-miR-433-3p	1	0	0	0	1	1	1
	hsa-miR-519d-3p	1	0	1	0	1	0	1
	hsa-miR-582-5p	1	0	1	1	0	1	1
	hsa-miR-613	1	0	1	1	1	0	0
	hsa-miR-613	1	0	1	1	1	0	0
	hsa-miR-660-5p	1	0	1	1	0	1	0
	hsa-miR-488-3p	1	0	1	0	1	0	1
	hsa-miR-1179	1	0	1	2	0	0	0
	hsa-miR-1276	1	0	1	1	0	1	0
	hsa-miR-1276	1	0	1	1	0	1	0
	hsa-miR-4735-3p	0	0	1	1	0	1	1
MXD1	hsa-let-7a-5p	1	0	0	1	1	1	1
	hsa-let-7b-5p	1	0	0	1	1	1	1
	hsa-let-7c-5p	1	0	0	1	1	1	1
	hsa-let-7d-5p	1	0	0	1	1	1	1
	hsa-let-7e-5p	1	0	0	1	1	1	1
	hsa-let-7f-5p	1	0	0	1	1	1	1
	hsa-miR-17-5p	1	0	0	1	1	0	1
	hsa-miR-19a-3p	1	0	1	1	1	0	1
	hsa-miR-19a-3p	1	0	1	1	1	0	1
	hsa-miR-19b-3p	1	0	1	1	1	0	1
	hsa-miR-19b-3p	1	0	1	1	1	0	1
	hsa-miR-22-3p	1	0	1	1	1	1	1
	hsa-miR-29a-3p	1	0	1	1	1	0	1
	hsa-miR-29a-3p	1	0	1	1	1	0	1
	hsa-miR-31-5p	1	0	1	1	1	0	0
	hsa-miR-93-5p	1	0	0	1	1	0	1
	hsa-miR-98-5p	1	0	0	1	1	1	1
	hsa-miR-101-3p	1	0	1	1	1	1	1
	hsa-miR-29b-3p	1	0	1	1	1	0	1
	hsa-miR-29b-3p	1	0	1	1	1	0	1
	hsa-miR-148a-3p	1	0	1	1	1	0	1
	hsa-miR-148a-3p	1	0	1	1	1	0	1
	hsa-miR-147a	0	0	0	9	0	0	0
	hsa-let-7g-5p	1	0	0	1	1	1	1
	hsa-let-7i-5p	1	0	1	1	1	1	1
	hsa-miR-1-3p	1	0	1	1	1	0	1
	hsa-miR-124-3p	1	0	1	0	1	0	1
	hsa-miR-130a-3p	1	0	1	1	1	0	1
	hsa-miR-130a-3p	1	0	1	1	1	0	1
	hsa-miR-137	1	0	1	1	1	1	1
	hsa-miR-137	1	0	1	1	1	0	1
	hsa-miR-152-3p	1	0	1	1	1	0	1
	hsa-miR-152-3p	1	0	1	1	1	0	1
	hsa-miR-146a-5p	1	0	1	1	1	0	0
	hsa-miR-149-5p	1	0	1	0	1	0	1
	hsa-miR-186-5p	1	0	0	1	1	0	1
	hsa-miR-194-5p	1	0	1	1	1	0	0
	hsa-miR-206	1	0	1	1	1	0	1
	hsa-miR-29c-3p	1	0	1	1	1	0	1
	hsa-miR-29c-3p	1	0	1	1	1	0	1
	hsa-miR-302a-3p	1	0	0	1	1	0	1
	hsa-miR-301a-3p	1	0	1	1	1	0	1
	hsa-miR-301a-3p	1	0	1	1	1	0	1
	hsa-miR-130b-3p	1	0	1	1	1	0	1
	hsa-miR-130b-3p	1	0	1	1	1	0	1
	hsa-miR-302b-3p	1	0	0	1	1	0	1
	hsa-miR-302c-3p	1	0	0	1	1	0	1
	hsa-miR-302d-3p	1	0	0	1	1	0	1
	hsa-miR-372-3p	1	0	0	1	1	0	1
	hsa-miR-373-3p	1	0	0	1	1	0	1
	hsa-miR-148b-3p	1	0	1	1	1	0	1
	hsa-miR-148b-3p	1	0	1	1	1	0	1
	hsa-miR-20b-5p	1	0	0	1	1	0	1
	hsa-miR-410-3p	1	0	0	0	1	1	1
	hsa-miR-485-5p	1	0	1	0	1	0	1
	hsa-miR-146b-5p	1	0	1	1	1	0	0
	hsa-miR-495-3p	2	0	0	2	0	0	0
	hsa-miR-520e	1	0	0	1	1	0	1
	hsa-miR-520a-5p	1	0	1	1	0	1	0
	hsa-miR-520a-3p	1	0	0	1	1	0	1
	hsa-miR-525-5p	1	0	1	1	0	1	0
	hsa-miR-519d-3p	1	0	0	1	1	0	1
	hsa-miR-520d-3p	1	0	0	1	1	0	1
	hsa-miR-582-5p	1	0	1	1	0	0	1
	hsa-miR-613	1	0	1	1	1	0	1
	hsa-miR-625-5p	2	0	1	1	0	0	0
	hsa-miR-758-3p	1	0	0	1	1	0	1
	hsa-miR-454-3p	1	0	1	1	1	0	1
	hsa-miR-454-3p	1	0	1	1	1	0	0
	hsa-miR-454-3p	1	0	1	1	1	0	1
	hsa-miR-301b-3p	1	0	1	1	1	0	1
	hsa-miR-301b-3p	1	0	1	1	1	0	1
	hsa-miR-302e	1	0	0	1	1	0	1
	hsa-miR-4458	0	0	1	1	0	1	1
SOD2	hsa-miR-129-5p	1	1	0	1	1	0	0
	hsa-miR-212-3p	1	0	1	1	1	0	0
	hsa-miR-212-3p	1	0	1	1	1	0	0
	hsa-miR-212-3p	1	0	1	1	1	0	0
	hsa-miR-132-3p	1	0	1	1	1	0	0
	hsa-miR-132-3p	1	0	1	1	1	0	0
	hsa-miR-132-3p	1	0	1	1	1	0	0
	hsa-miR-144-3p	1	0	1	1	1	0	0
	hsa-miR-377-3p	1	0	1	1	1	0	0
	hsa-miR-377-3p	1	0	1	1	1	0	0
	hsa-miR-377-3p	1	0	1	1	1	0	0
	hsa-miR-382-5p	1	0	1	1	1	0	0
	hsa-miR-519d-3p	1	0	1	1	1	0	0
