# Supplementary material for: Identification and validation of aging-related genes in COPD based on bioinformatics analysis
Source: Aging (Albany NY). 2022 May 24;14(10):4336–56. doi: 10.18632/aging.204064 (PMC9186770; doi:10.18632/aging.204064)
Supplement: Supplementary Table 3 [file aging-14-204064-s003.xls]

## Sheet: S3
Supplementary Table 3. miRNA prediction.
geneName	miRNAname	miRNA-target predicting programs
		PITA	RNA22	miRmap	microT	miRanda	PicTar	TargetScan
CDKN1A	hsa-let-7a-5p	1	0	0	1	1	0	1
	hsa-let-7b-5p	1	0	0	1	1	0	1
	hsa-let-7c-5p	1	0	0	1	1	0	1
	hsa-let-7e-5p	1	0	0	1	1	0	1
	hsa-let-7f-5p	1	0	0	1	1	0	1
	hsa-miR-17-5p	1	0	1	1	1	1	1
	hsa-miR-17-5p	1	0	1	1	1	0	1
	hsa-miR-20a-5p	1	0	1	1	1	1	1
	hsa-miR-20a-5p	1	0	1	1	1	0	1
	hsa-miR-22-3p	1	0	1	0	1	1	0
	hsa-miR-28-5p	1	0	1	1	1	0	0
	hsa-miR-28-5p	1	0	1	1	1	0	0
	hsa-miR-93-5p	1	0	1	1	1	1	1
	hsa-miR-93-5p	1	0	1	1	1	0	1
	hsa-miR-98-5p	1	0	0	1	1	0	1
	hsa-miR-106a-5p	1	0	1	1	1	1	1
	hsa-miR-106a-5p	1	0	1	1	1	0	1
	hsa-miR-224-5p	1	0	1	1	1	0	0
	hsa-let-7g-5p	1	0	0	1	1	0	1
	hsa-let-7i-5p	1	0	0	1	1	0	1
	hsa-miR-130a-3p	1	0	0	1	1	0	1
	hsa-miR-106b-5p	1	0	1	1	1	1	1
	hsa-miR-106b-5p	1	0	1	1	1	0	1
	hsa-miR-301a-3p	1	0	0	1	1	0	1
	hsa-miR-130b-3p	1	0	0	1	1	0	1
	hsa-miR-365a-3p	1	0	1	1	1	0	0
	hsa-miR-370-3p	1	0	1	1	1	0	1
	hsa-miR-20b-5p	1	0	1	1	1	1	1
	hsa-miR-20b-5p	1	0	1	1	1	0	1
	hsa-miR-485-5p	1	0	1	0	1	0	1
	hsa-miR-526b-3p	0	0	1	1	0	1	1
	hsa-miR-519d-3p	1	0	1	1	1	1	1
	hsa-miR-519d-3p	1	0	1	1	1	0	1
	hsa-miR-499a-5p	1	0	0	1	0	1	1
	hsa-miR-454-3p	1	0	0	1	1	0	1
	hsa-miR-708-5p	1	0	1	1	1	0	0
	hsa-miR-708-5p	1	0	1	1	1	0	0
	hsa-miR-301b-3p	1	0	0	1	1	0	1
HIF1A	hsa-miR-17-5p	1	0	1	1	1	1	1
	hsa-miR-18a-5p	1	0	1	1	1	1	1
	hsa-miR-18a-5p	1	0	1	1	1	0	0
	hsa-miR-19a-3p	1	0	0	0	1	1	1
	hsa-miR-19b-3p	1	0	0	0	1	1	1
	hsa-miR-20a-5p	1	0	1	0	1	1	1
	hsa-miR-93-5p	1	0	1	1	1	1	1
	hsa-miR-106a-5p	1	0	1	0	1	1	1
	hsa-miR-199a-5p	1	0	1	0	1	1	1
	hsa-miR-199b-5p	1	0	1	0	1	0	1
	hsa-miR-135a-5p	1	0	1	0	1	1	1
	hsa-miR-138-5p	1	0	0	0	1	1	1
	hsa-miR-155-5p	1	0	0	0	1	1	1
	hsa-miR-106b-5p	1	0	1	0	1	1	1
	hsa-miR-376c-3p	1	0	1	1	1	0	0
	hsa-miR-376c-3p	1	0	1	1	1	0	0
	hsa-miR-151a-3p	1	0	1	0	0	1	1
	hsa-miR-135b-5p	1	0	1	0	1	0	1
	hsa-miR-338-3p	1	0	1	1	1	0	0
	hsa-miR-18b-5p	1	0	1	1	1	0	1
	hsa-miR-18b-5p	1	0	1	1	1	0	0
	hsa-miR-20b-5p	1	0	1	1	1	1	1
	hsa-miR-433-3p	1	0	0	0	1	1	1
	hsa-miR-519d-3p	1	0	1	0	1	0	1
	hsa-miR-582-5p	1	0	1	1	0	1	1
	hsa-miR-613	1	0	1	1	1	0	0
	hsa-miR-613	1	0	1	1	1	0	0
	hsa-miR-660-5p	1	0	1	1	0	1	0
	hsa-miR-488-3p	1	0	1	0	1	0	1
	hsa-miR-1179	1	0	1	2	0	0	0
	hsa-miR-1276	1	0	1	1	0	1	0
	hsa-miR-1276	1	0	1	1	0	1	0
	hsa-miR-4735-3p	0	0	1	1	0	1	1
MXD1	hsa-let-7a-5p	1	0	0	1	1	1	1
	hsa-let-7b-5p	1	0	0	1	1	1	1
	hsa-let-7c-5p	1	0	0	1	1	1	1
	hsa-let-7d-5p	1	0	0	1	1	1	1
	hsa-let-7e-5p	1	0	0	1	1	1	1
	hsa-let-7f-5p	1	0	0	1	1	1	1
	hsa-miR-17-5p	1	0	0	1	1	0	1
	hsa-miR-19a-3p	1	0	1	1	1	0	1
	hsa-miR-19a-3p	1	0	1	1	1	0	1
	hsa-miR-19b-3p	1	0	1	1	1	0	1
	hsa-miR-19b-3p	1	0	1	1	1	0	1
	hsa-miR-22-3p	1	0	1	1	1	1	1
	hsa-miR-29a-3p	1	0	1	1	1	0	1
	hsa-miR-29a-3p	1	0	1	1	1	0	1
	hsa-miR-31-5p	1	0	1	1	1	0	0
	hsa-miR-93-5p	1	0	0	1	1	0	1
	hsa-miR-98-5p	1	0	0	1	1	1	1
	hsa-miR-101-3p	1	0	1	1	1	1	1
	hsa-miR-29b-3p	1	0	1	1	1	0	1
	hsa-miR-29b-3p	1	0	1	1	1	0	1
	hsa-miR-148a-3p	1	0	1	1	1	0	1
	hsa-miR-148a-3p	1	0	1	1	1	0	1
	hsa-miR-147a	0	0	0	9	0	0	0
	hsa-let-7g-5p	1	0	0	1	1	1	1
	hsa-let-7i-5p	1	0	1	1	1	1	1
	hsa-miR-1-3p	1	0	1	1	1	0	1
	hsa-miR-124-3p	1	0	1	0	1	0	1
	hsa-miR-130a-3p	1	0	1	1	1	0	1
	hsa-miR-130a-3p	1	0	1	1	1	0	1
	hsa-miR-137	1	0	1	1	1	1	1
	hsa-miR-137	1	0	1	1	1	0	1
	hsa-miR-152-3p	1	0	1	1	1	0	1
	hsa-miR-152-3p	1	0	1	1	1	0	1
	hsa-miR-146a-5p	1	0	1	1	1	0	0
	hsa-miR-149-5p	1	0	1	0	1	0	1
	hsa-miR-186-5p	1	0	0	1	1	0	1
	hsa-miR-194-5p	1	0	1	1	1	0	0
	hsa-miR-206	1	0	1	1	1	0	1
	hsa-miR-29c-3p	1	0	1	1	1	0	1
	hsa-miR-29c-3p	1	0	1	1	1	0	1
	hsa-miR-302a-3p	1	0	0	1	1	0	1
	hsa-miR-301a-3p	1	0	1	1	1	0	1
	hsa-miR-301a-3p	1	0	1	1	1	0	1
	hsa-miR-130b-3p	1	0	1	1	1	0	1
	hsa-miR-130b-3p	1	0	1	1	1	0	1
	hsa-miR-302b-3p	1	0	0	1	1	0	1
	hsa-miR-302c-3p	1	0	0	1	1	0	1
	hsa-miR-302d-3p	1	0	0	1	1	0	1
	hsa-miR-372-3p	1	0	0	1	1	0	1
	hsa-miR-373-3p	1	0	0	1	1	0	1
	hsa-miR-148b-3p	1	0	1	1	1	0	1
	hsa-miR-148b-3p	1	0	1	1	1	0	1
	hsa-miR-20b-5p	1	0	0	1	1	0	1
	hsa-miR-410-3p	1	0	0	0	1	1	1
	hsa-miR-485-5p	1	0	1	0	1	0	1
	hsa-miR-146b-5p	1	0	1	1	1	0	0
	hsa-miR-495-3p	2	0	0	2	0	0	0
	hsa-miR-520e	1	0	0	1	1	0	1
	hsa-miR-520a-5p	1	0	1	1	0	1	0
	hsa-miR-520a-3p	1	0	0	1	1	0	1
	hsa-miR-525-5p	1	0	1	1	0	1	0
	hsa-miR-519d-3p	1	0	0	1	1	0	1
	hsa-miR-520d-3p	1	0	0	1	1	0	1
	hsa-miR-582-5p	1	0	1	1	0	0	1
	hsa-miR-613	1	0	1	1	1	0	1
	hsa-miR-625-5p	2	0	1	1	0	0	0
	hsa-miR-758-3p	1	0	0	1	1	0	1
	hsa-miR-454-3p	1	0	1	1	1	0	1
	hsa-miR-454-3p	1	0	1	1	1	0	0
	hsa-miR-454-3p	1	0	1	1	1	0	1
	hsa-miR-301b-3p	1	0	1	1	1	0	1
	hsa-miR-301b-3p	1	0	1	1	1	0	1
	hsa-miR-302e	1	0	0	1	1	0	1
	hsa-miR-4458	0	0	1	1	0	1	1
SOD2	hsa-miR-129-5p	1	1	0	1	1	0	0
	hsa-miR-212-3p	1	0	1	1	1	0	0
	hsa-miR-212-3p	1	0	1	1	1	0	0
	hsa-miR-212-3p	1	0	1	1	1	0	0
	hsa-miR-132-3p	1	0	1	1	1	0	0
	hsa-miR-132-3p	1	0	1	1	1	0	0
	hsa-miR-132-3p	1	0	1	1	1	0	0
	hsa-miR-144-3p	1	0	1	1	1	0	0
	hsa-miR-377-3p	1	0	1	1	1	0	0
	hsa-miR-377-3p	1	0	1	1	1	0	0
	hsa-miR-377-3p	1	0	1	1	1	0	0
	hsa-miR-382-5p	1	0	1	1	1	0	0
	hsa-miR-519d-3p	1	0	1	1	1	0	0
